# Supplementary material for: Pattern transition recognition based on transfer learning for exoskeleton across different terrains
Source: PeerJ journal article supplement (doi:10.7717/peerj-cs.3099), 2025-08-06
Supplement: datasets.zip [file datasets.zip]

## Sheet: Sheet1
32.131	-4.4196	-7.782	-8.37	11.561	-3.5541
32.334	-4.6997	-8.798	-8.76	9.864	-3.9716
32.444	-4.9634	-9.836	-9.222	8.084	-4.6362
32.466	-5.2271	-10.638	-9.732	6.096	-5.4327
32.67	-5.5292	-11.605	-10.216	4.827	-6.3556
32.983	-5.8258	-12.901	-10.71	3.6682	-7.4158
33.274	-6.0895	-14.187	-11.265	3.1171	-8.6298
33.548	-6.3312	-15.538	-11.853	2.754	-9.9701
33.625	-6.5784	-16.78	-12.413	2.1932	-11.475
33.461	-6.7871	-17.823	-13.017	2.3413	-13.26
33.06	-6.9574	-18.455	-13.688	1.2861	-15.342
32.637	-7.1002	-19.29	-14.468	1.9453	-17.562
32.082	-7.2485	-19.988	-15.27	1.2859	-19.852
31.439	-7.4023	-20.394	-16.083	0.4672	-22.258
30.708	-7.5507	-20.768	-16.917	0.6484	-24.802
29.912	-7.7209	-21.02	-17.741	0.7913	-27.389
29.077	-7.9352	-21.163	-18.494	0.9286	-29.982
28.259	-8.1439	-21.235	-19.219	0.0824	-33.799
27.435	-8.2483	-21.625	-20.202	0.2307	-36.222
26.638	-8.0725	-20.152	-21.51	0.3461	-38.249
25.875	-7.0508	-21.432	-23.861	0.4504	-39.908
25.111	-5.3204	-21.24	-27.157	0.5218	-41.396
24.111	-3.3759	-20.773	-30.892	0.6867	-42.55
23.057	-1.3654	-20.152	-34.765	0.8404	-43.396
22.002	0.6781	-19.466	-38.539	0.9558	-44.143
21.013	1.8866	-18.796	-41.225	0.0272	-45.005
20.123	2.9248	-18.164	-43.213	0.1316	-45.939
19.299	3.8916	-17.538	-45.01	0.2305	-46.461
18.481	5.0012	-16.719	-46.888	0.3239	-46.28
17.64	6.0284	-15.884	-48.564	0.3678	-45.753
16.86	6.7206	-15.187	-49.316	0.3788	-44.813
16.047	7.2809	-14.5	-49.475	0.4172	-43.467
15.174	7.8357	-13.698	-49.563	0.4392	-42.017
14.229	8.3795	-12.836	-49.514	0.4722	-40.408
13.29	8.8574	-11.918	-49.19	0.5381	-38.65
12.328	9.3188	-11.072	-48.723	0.5765	-36.634
11.417	8.7585	-10.144	-47.163	1.593	-34.327
10.604	10.78	-9.397	-48.113	1.6644	-31.91
9.8235	11.434	-8.683	-47.58	1.7029	-29.482
9.0544	12.148	-7.925	-46.987	1.7029	-27.109
8.3184	12.895	-7.227	-46.377	1.6974	-24.807
7.6207	13.675	-6.59	-45.718	2.7303	-22.544
6.8956	14.559	-5.947	-45.042	2.7633	-20.319
6.1595	15.587	-5.293	-44.411	2.7798	-18.155
5.385	16.702	-4.596	-43.823	2.8182	-16.068
4.5665	17.872	-3.882	-43.246	2.8732	-14.035
3.7206	19.042	-3.146	-42.615	2.9391	-12.041
2.8801	20.19	-2.432	-41.9	1.0105	-10.074
2.0452	21.245	-1.728	-41.071	1.0709	-8.1519
1.2487	22.217	-1.064	-40.137	1.0874	-6.2292
0.51257	23.217	-0.438	-39.143	1.0325	-4.2682
-0.086182	24.205	0.0184	-38.121	1.9885	-2.2302
-0.93213	25.469	0.6392	-37.369	0.9666	-0.12634
-1.4979	26.694	0.9852	-36.627	0.9116	1.9061
-2.0308	27.798	1.2928	-35.808	0.8347	3.8562
-2.4592	28.814	1.4796	-34.946	0.7468	5.7239
-2.8108	29.671	1.5016	-33.935	0.7084	7.5476
-3.1678	30.429	1.4741	-32.809	-0.7139	9.3109
-3.4919	31.033	1.3972	-31.529	-0.7194	11.019
-3.7831	31.621	1.2928	-30.244	-0.7084	12.678
-4.0522	32.22	1.1445	-29.002	-0.7029	14.337
-4.3104	32.896	0.9138	-27.893	-0.7303	16.029
-4.5851	33.752	0.6721	-26.992	-1.7688	17.732
-4.8817	34.5	0.4249	-26.135	-1.8182	19.27
-5.2113	35.137	0.1832	-25.234	-1.8732	20.66
-5.5629	35.735	-0.064	-24.361	-1.9611	21.885
-5.9199	36.279	-0.295	-23.515	-2.0544	22.961
-6.2825	36.763	-0.509	-22.652	-3.1313	23.835
-6.634	37.021	-0.707	-21.614	-4.1698	24.615
-6.9636	37.12	-0.926	-20.466	-5.2028	25.406
-7.2767	37.142	-1.168	-19.269	-6.2742	26.274
-7.5734	37.279	-1.465	-18.263	-7.6312	27.318
-7.8865	37.328	-1.756	-17.203	-8.104	28.383
-8.1996	37.328	-2.047	-16.165	-9.669	29.257
-8.5017	37.081	-2.338	-15.05	-10.268	29.927
-8.7874	36.829	-2.629	-14.067	-11.966	30.306
-9.084	36.494	-2.838	-13.116	-12.768	30.487
-9.2598	35.977	-3.162	-11.957	-13.845	30.454
-9.3861	35.483	-3.656	-11.034	-15.086	30.482
-9.5015	35.098	-4.233	-10.523	-16.294	29.246
-9.7102	35.104	-4.75	-10.677	-17.53	26.537
-9.875	35.164	-5.326	-11.089	-18.876	23.011
-10.012	35.323	-6.041	-11.314	-20.299	19.308
-10.155	35.895	-6.832	-12.193	-21.744	15.672
-10.331	36.614	-7.667	-13.462	-23.133	12.766
-10.578	37.378	-8.392	-14.989	-24.589	10.41
-10.809	37.801	-9.067	-16.544	-26.144	8.1683
-11.029	37.62	-9.715	-17.384	-28.006	6.1194
-11.182	37.235	-10.364	-18.038	-30.126	4.1858
-11.281	36.818	-11.034	-18.692	-32.56	2.4005
-11.364	36.417	-11.715	-19.461	-35.081	1.0052
-11.408	35.944	-12.424	-20.23	-37.652	0.1593
-11.43	35.214	-13.176	-20.724	-40.245	-0.17578
-11.506	34.384	-13.912	-21.054	-42.815	-0.39551
-11.578	33.489	-14.676	-21.224	-45.375	-0.57129
-11.644	32.571	-15.467	-21.323	-47.919	-0.73059
-11.721	31.714	-16.23	-21.46	-50.434	-0.87891
-11.721	30.841	-16.972	-21.477	-52.928	-0.99426
-11.633	29.83	-17.829	-21.29	-55.433	-1.1261
-11.259	28.633	-19.054	-20.752	-57.735	-1.2305
-10.221	27.562	-21.081	-20.136	-59.795	-1.3678
-8.65	26.479	-23.937	-19.582	-61.613	-1.4777
-6.8483	25.353	-27.096	-18.862	-63.069	-1.582
-4.8707	24.216	-30.331	-18.071	-64.255	-1.6754
-2.8602	23.134	-33.506	-17.318	-65.057	-1.7743
-1.1519	22.118	-36.572	-16.566	-65.118	-1.8567
-0.086182	21.168	-38.89	-15.912	-64.426	-1.9391
0.83118	20.278	-40.911	-15.297	-62.915	-2.016
1.6771	19.465	-42.757	-14.742	-60.981	-2.0654
2.3198	18.586	-44.059	-14.094	-59.015	-2.1204
2.7922	17.718	-44.679	-13.418	-56.631	-2.1533
3.3251	16.998	-45.042	-12.759	-54.39	-2.1753
3.9293	16.328	-45.229	-12.314	-52.571	-2.1973
4.583	15.669	-45.157	-11.891	-51.088	-2.2192
5.3521	14.971	-45.009	-11.441	-49.946	-2.2302
6.187	14.263	-45.734	-10.941	-48.808	-2.2467
7.0934	13.565	-45.531	-10.485	-47.468	-2.2687
8.0437	12.845	-43.916	-10.018	-45.782	-2.2852
9.016	12.093	-43.663	-9.507	-43.486	-2.2961
9.9993	11.307	-43.29	-8.974	-40.761	-2.2961
11.048	10.527	-42.856	-8.474	-37.866	-2.2961
12.142	9.7363	-42.394	-7.958	-34.845	-2.2797
13.301	8.9398	-41.949	-7.425	-31.73	-2.2632
14.487	8.1653	-41.433	-6.92	-28.731	-2.2522
15.624	7.4677	-40.719	-6.448	-25.962	-2.2028
16.745	6.8304	-39.944	-6.079	-23.496	-2.1753
17.849	6.1877	-39.12	-5.717	-21.381	-2.1588
18.915	5.5505	-38.203	-5.382	-19.437	-2.1478
19.942	4.9463	-37.214	-5.063	-17.591	-2.1149
20.931	4.3695	-36.116	-4.805	-15.745	-2.1149
21.821	3.7543	-34.852	-4.519	-13.619	-2.0654
22.667	3.0896	-33.512	-4.151	-11.433	-2.0544
23.479	2.3865	-32.144	-3.734	-9.3071	-2.0435
24.325	1.7383	-30.82	-3.382	-7.2307	-2.016
25.435	1.167	-29.776	-3.124	-5.0389	-1.972
26.517	0.70007	-28.804	-2.976	-1.8309	-1.9116
27.506	0.32104	-27.739	-2.998	0.1246	-1.8842
28.374	-0.025024	-26.656	-3.08	1.9648	-1.8677
29.203	-0.35461	-25.585	-3.223	3.701	-1.8732
29.956	-0.6897	-24.443	-3.421	5.255	-1.8842
30.571	-1.0303	-23.196	-3.662	6.771	-1.8896
31	-1.3763	-21.789	-3.915	8.496	-1.8896
31.373	-1.7499	-20.323	-4.168	10.485	-1.8896
31.747	-2.1509	-18.823	-4.393	12.885	-1.9061
32.082	-2.5464	-17.247	-4.624	15.022	-1.9061
32.236	-2.9584	-15.511	-4.822	16.928	-1.9006
32.351	-3.3429	-13.83	-5.349	18.719	-1.9061
32.582	-3.7164	-12.418	-5.591	20.383	-1.9501
32.768	-4.101	-11.078	-5.81	21.784	-2.016
32.917	-4.48	-9.792	-6.014	22.861	-2.0929
33.027	-4.837	-8.551	-6.239	23.591	-2.2083
33.06	-5.1776	-7.403	-6.491	23.921	-2.4115
33.142	-5.5182	-6.551	-6.777	23.91	-2.6917
33.625	-5.8478	-6.282	-7.123	23.872	-3.0487
34.142	-6.1938	-6.288	-7.469	23.707	-3.5431
34.488	-6.5564	-6.502	-7.815	23.471	-4.1144
34.746	-6.9354	-6.7	-8.156	23.174	-4.845
34.614	-7.3145	-6.458	-8.529	22.284	-5.6854
34.235	-7.7045	-6.008	-8.947	20.966	-6.6357
34.136	-8.0505	-6.167	-9.452	19.213	-7.6025
34.092	-8.3582	-6.93	-9.952	16.011	-8.6627
33.889	-8.6218	-7.645	-10.458	12.655	-9.8108
33.895	-8.869	-8.276	-11.04	9.342	-11.118
34.076	-9.1327	-9.062	-11.693	7.98	-12.475
34.274	-9.4733	-10.21	-12.254	5.157	-13.914
34.285	-9.8523	-11.314	-12.699	4.7783	-15.458
34.142	-10.204	-12.308	-13.111	3.2487	-17.254
33.862	-10.49	-13.275	-13.567	2.8362	-19.281
33.439	-10.698	-14.225	-14.132	1.0886	-21.561
32.939	-10.891	-15.275	-14.731	0.7148	-23.983
32.296	-11.055	-16.115	-15.363	0.0499	-26.614
31.565	-11.209	-16.714	-16.011	0.2642	-29.344
30.752	-11.352	-17.164	-16.67	0.4839	-32.124
29.846	-11.555	-17.466	-17.324	0.6377	-34.909
28.923	-11.687	-17.675	-18.077	0.7585	-37.656
27.55	-11.808	-17.362	-18.873	0.8684	-40.309
28	-11.934	-18.757	-19.642	0.9728	-42.863
25.512	-12.044	-17.065	-20.345	0.1431	-45.374
24.408	-12.088	-16.686	-21.098	0.2859	-47.84
23.342	-11.83	-16.252	-22.185	0.4013	-50.268
22.342	-11.149	-15.791	-23.91	0.4891	-52.234
21.431	-9.9402	-15.379	-26.421	0.555	-53.784
20.557	-8.111	-15.011	-29.629	0.632	-54.624
19.629	-6.0236	-14.555	-33.111	0.7199	-54.695
18.777	-3.9856	-14.181	-36.413	0.8242	-53.624
17.986	-2.431	-13.775	-38.973	0.9176	-52.229
17.223	-1.7279	-13.33	-40.428	0.967	-50.839
16.503	-0.83801	-12.858	-41.983	0	-49.142
15.833	-0.25024	-12.435	-43.01	0.0275	-47.219
15.157	0.29358	-11.918	-43.752	0.0549	-45.291
14.482	0.80444	-11.407	-44.125	0.0439	-43.347
13.812	1.2329	-10.951	-44.059	0.0659	-41.418
13.147	1.7932	-10.6	-43.839	0.2032	-39.622
12.372	2.4304	-10.182	-43.532	0.2252	-37.925
11.565	3.1171	-9.567	-43.191	0.2582	-36.2
10.724	3.8641	-8.941	-42.856	0.3516	-34.2
9.829	4.7046	-8.298	-42.538	0.434	-31.893
8.9336	5.611	-7.677	-42.219	0.4669	-29.493
8.0217	6.6162	-7.002	-41.95	0.423	-27.12
7.1483	7.7039	-6.348	-41.719	0.3571	-24.939
6.3243	8.8739	-5.744	-41.543	0.3021	-22.917
5.5059	10.055	-5.123	-41.318	0.2692	-20.901
4.7148	11.236	-4.552	-41.016	0.2527	-18.858
3.9843	12.422	-4.014	-40.62	0.2142	-16.776
3.358	13.642	-3.563	-40.104	0.2307	-14.799
2.8032	14.872	-3.266	-39.527	0.2692	-12.914
2.2594	16.053	-3.003	-38.841	0.2747	-11.074
1.7101	17.053	-2.756	-37.885	0.2801	-9.234
1.1278	17.965	-2.492	-36.715	1.3131	-7.3279
0.52356	18.915	-2.267	-35.556	1.3625	-5.3613
-0.086182	19.992	-2.272	-34.518	1.3845	-3.3398
-0.70691	21.113	-2.058	-33.529	1.3845	-1.2854
-1.3661	22.195	-1.8	-32.518	1.3735	0.78003
-2.0472	23.233	-1.509	-31.491	0.3461	2.8619
-2.7614	24.189	-1.168	-30.387	0.3131	4.9548
-3.4535	25.024	-0.86	-29.173	0.2582	7.0313
-4.0797	25.815	-0.564	-27.92	0.1263	8.9429
-4.64	26.578	-0.344	-26.662	-0.022	10.69
-5.0685	27.309	-0.289	-25.404	-0.978	12.294
-5.4585	27.93	-0.3	-24.07	-0.978	13.782
-5.821	28.534	-0.366	-22.768	0	15.255
-6.1946	29.116	-0.421	-21.482	-1.033	16.622
-6.5297	29.644	-0.498	-20.164	-1.0824	17.891
-6.8428	30.16	-0.613	-18.857	-1.1703	19.001
-7.1284	30.621	-0.795	-17.538	-2.3241	20.017
-7.4086	31.05	-0.97	-16.247	-3.5218	20.995
-7.6777	31.451	-1.157	-15	-4.7471	22.033
-7.9304	31.764	-1.432	-13.72	-5.9943	23.258
-8.1886	31.929	-1.789	-12.413	-6.3623	24.62
-8.4797	31.984	-2.129	-11.062	-7.7853	26.06
-8.7874	31.962	-2.459	-9.672	-8.2687	27.444
-9.106	31.967	-2.772	-8.403	-9.7795	28.718
-9.4191	32.033	-3.014	-7.398	-10.56	29.855
-9.6553	31.984	-3.349	-6.36	-11.548	30.839
-9.864	31.94	-3.794	-5.486	-12.647	31.668
-10.1	31.929	-4.31	-4.827	-13.746	32.157
-10.364	31.824	-4.816	-4.289	-14.833	32.382
-10.672	31.682	-5.288	-4.036	-16.014	32.173
-10.941	31.522	-5.826	-3.921	-17.272	31.723
-11.204	31.528	-6.431	-4.223	-18.558	30.998
-11.446	31.775	-7.101	-5.239	-19.838	29.443
-11.792	32.467	-7.656	-6.777	-21.134	25.752
-12.149	33.049	-8.172	-8.041	-22.474	21.297
-12.424	33.994	-8.804	-9.546	-23.946	17.095
-12.688	35.329	-9.463	-11.633	-25.605	13.206
-12.836	35.933	-10.281	-13.347	-27.462	9.7614
-13.023	35.994	-11.039	-14.638	-29.615	6.7401
-13.209	35.763	-11.737	-15.791	-31.928	4.2133
-13.33	35.345	-12.479	-16.961	-34.416	2.0819
-13.358	34.829	-13.319	-18.131	-37.218	1.0162
-13.319	34.214	-14.258	-19.17	-40.184	0.42297
-13.286	33.368	-15.236	-19.856	-43.194	0.049438
-13.275	32.495	-16.225	-20.444	-46.188	-0.21423
-13.319	31.577	-17.12	-20.84	-49.083	-0.43396
-13.413	30.632	-17.911	-21.092	-51.907	-0.59875
-13.468	29.66	-18.647	-21.202	-54.747	-0.7251
-13.468	28.732	-19.499	-21.274	-57.614	-0.85144
-13.083	27.622	-20.828	-21.048	-60.333	-0.98328
-12.193	26.43	-22.844	-20.57	-62.453	-1.1096
-10.606	25.271	-25.772	-20.01	-64.244	-1.214
-8.7489	24.172	-28.964	-19.472	-65.722	-1.3184
-6.623	23.09	-32.172	-18.906	-66.755	-1.4282
-4.5796	22.025	-35.264	-18.241	-66.991	-1.5161
-2.8383	21.008	-38.159	-17.61	-66.518	-1.5985
-1.4814	20.069	-40.642	-16.994	-65.607	-1.6864
-0.3938	19.179	-42.57	-16.505	-63.92	-1.7578
0.573	18.306	-44.213	-15.973	-61.844	-1.8237
1.2157	17.421	-45.311	-15.374	-59.696	-1.8842
1.7815	16.515	-45.882	-14.665	-57.488	-1.8842
2.3528	15.658	-46.02	-14.105	-55.389	-1.9391
2.9406	14.872	-45.932	-13.55	-53.703	-1.9391
3.6876	14.12	-45.849	-13.094	-52.335	-1.9501
4.5226	13.307	-45.718	-12.583	-51.143	-1.972
5.4564	12.477	-45.602	-12.045	-49.77	-2.016
6.4067	11.637	-45.448	-11.501	-47.809	-2.0544
7.4285	10.813	-45.311	-11.018	-45.491	-2.0764
8.4832	10	-45.108	-10.573	-42.947	-2.0764
9.5653	9.1595	-44.861	-10.111	-40.344	-2.0709
10.73	8.3136	-44.663	-9.645	-37.789	-2.0709
11.889	7.4786	-44.432	-9.161	-35.273	-2.0874
13.053	6.6437	-44.114	-8.672	-32.703	-2.0984
14.251	5.8032	-43.619	-8.172	-30.033	-2.1094
15.47	4.9628	-43.048	-7.651	-27.621	-2.1313
16.536	4.1608	-42.251	-7.173	-25.375	-2.1259
17.541	3.3862	-41.263	-6.761	-23.199	-2.1259
18.508	2.6447	-40.203	-6.332	-21.095	-2.1149
19.651	1.925	-39.258	-5.948	-18.975	-2.1094
20.942	1.189	-38.489	-5.563	-16.8	-2.1149
22.178	0.43091	-37.665	-5.129	-14.641	-2.1204
23.287	-0.33264	-36.643	-4.679	-12.477	-2.1313
24.325	-1.0907	-35.522	-4.217	-10.406	-2.1423
25.402	-1.8433	-34.479	-3.756	-8.3348	-2.1698
26.402	-2.5848	-33.375	-3.305	-6.2364	-2.2028
27.341	-3.3209	-32.199	-2.888	-4.0996	-2.2522
28.204	-4.0515	-30.925	-2.509	-1.9683	-2.3236
28.94	-4.7107	-29.513	-2.234	0.0917	-2.3346
29.769	-5.2271	-28.156	-2.13	2.1241	-2.3346
30.275	-5.6885	-26.459	-2.135	4.157	-2.3566
30.752	-6.1115	-24.739	-2.168	6.293	-2.417
31.137	-6.5234	-22.927	-2.207	8.568	-2.5104
31.302	-6.9354	-20.839	-2.273	10.77	-2.6367
31.521	-7.3419	-18.884	-2.366	12.863	-2.807
31.686	-7.7209	-16.977	-2.531	14.83	-3.0487
31.791	-8.089	-15.077	-2.718	16.665	-3.3673
31.857	-8.4515	-13.275	-2.943	18.395	-3.7463
31.961	-8.8141	-11.605	-3.185	19.933	-4.1748
32.137	-9.1656	-10.182	-3.498	21.169	-4.6857
32.417	-9.5172	-9.04	-3.855	22.004	-5.246
32.719	-9.8743	-8.908	-4.25	22.669	-5.8228
32.768	-10.248	-6.54	-4.651	22.806	-6.438
32.703	-10.643	-5.81	-5.063	22.268	-7.1631
32.648	-9.7974	-5.195	-6.739	21.026	-8.0035
32.856	-11.544	-5.535	-5.827	19.494	-8.9484
33.054	-11.874	-6.282	-6.365	17.126	-9.9866
33.252	-12.198	-7.436	-6.881	15.033	-11.157
33.505	-12.505	-8.848	-7.414	13.567	-12.431
33.752	-12.813	-10.369	-7.969	11.282	-13.854
34.048	-13.104	-12.023	-8.546	9.492	-15.392
34.021	-13.384	-13.412	-9.134	7.234	-17.117
33.829	-13.648	-14.637	-9.743	6.4542	-19.006
33.477	-13.824	-15.978	-10.49	5.0454	-21.154
32.977	-13.972	-17.225	-11.254	4.8145	-23.478
32.192	-14.099	-17.961	-12.034	3.155	-26.104
31.313	-14.219	-18.433	-12.82	3.3748	-28.922
30.445	-14.307	-18.922	-13.671	2.6384	-31.926
29.533	-14.395	-19.312	-14.528	2.8691	-34.969
28.539	-14.483	-19.449	-15.407	1.0065	-38.029
27.55	-14.582	-19.499	-16.286	1.4294	-41.072
26.539	-14.67	-19.471	-17.154	0.9678	-44.028
25.452	-14.73	-19.323	-17.994	0.4182	-46.961
24.276	-14.576	-18.988	-19.049	0.7258	-49.834
23.155	-13.939	-18.461	-20.713	0.8577	-52.421
22.145	-12.363	-18.049	-23.641	0.0225	-54.393
21.227	-10.33	-17.741	-27.168	0.2861	-55.97
20.277	-8.1055	-17.389	-30.98	0.4015	-56.695
19.409	-5.8588	-17.027	-34.809	0.407	-56.607
18.739	-4.09	-16.829	-37.901	0.4235	-55.657
18.195	-2.8595	-16.774	-40.181	0.5004	-54.597
17.64	-1.4642	-16.653	-42.51	0.5553	-53.273
17.014	-0.014038	-16.324	-44.718	0.6487	-51.471
16.333	1.3043	-15.906	-46.432	0.819	-49.856
15.652	2.3425	-15.527	-47.74	0.8959	-48.466
14.943	3.2214	-15.159	-48.476	1.9453	-47.01
14.174	3.9246	-14.742	-48.761	1.0167	-45.505
13.339	4.6222	-14.214	-48.75	1.0387	-43.72
12.455	5.3912	-13.599	-48.641	1.0552	-41.699
11.565	6.1823	-12.995	-48.377	1.0991	-39.326
10.631	7.0117	-12.358	-48.036	1.1321	-36.7
9.6807	7.9126	-11.72	-47.663	2.1486	-33.887
8.7413	8.8574	-11.072	-47.295	2.176	-31.091
7.8405	9.8682	-10.479	-46.899	2.22	-28.372
6.9945	10.956	-9.979	-46.548	2.2364	-25.796
6.1705	12.12	-9.567	-46.196	2.22	-23.34
5.418	13.279	-9.232	-45.784	2.9728	-20.945
4.7258	14.406	-8.996	-45.202	1.6157	-18.605
4.0447	15.565	-8.793	-44.559	1.3026	-16.326
3.3086	16.702	-8.518	-43.79	1.2861	-14.101
2.5835	17.789	-8.183	-42.9	1.2202	-11.865
1.8804	18.828	-7.848	-41.845	1.1818	-9.5801
1.1718	19.734	-7.562	-40.593	0.2751	-7.2565
0.43567	20.624	-7.238	-39.247	0.3521	-4.9329
-0.32788	21.58	-6.81	-37.94	0.3685	-2.6038
-1.0859	22.634	-6.326	-36.731	0.374	-0.26917
-1.822	23.788	-5.848	-35.644	0.4125	2.038
-2.5416	24.881	-5.442	-34.529	-0.4784	4.2517
-3.2338	25.908	-5.074	-33.37	-0.4949	6.3885
-3.849	26.853	-4.788	-32.145	-0.5168	8.476
-4.3049	27.682	-4.689	-30.832	-0.5992	10.569
-4.7334	28.397	-4.645	-29.392	-0.764	12.75
-5.1509	29.056	-4.662	-27.904	-1.9838	14.985
-5.5848	29.666	-4.651	-26.338	-2.2145	17.254
-5.9749	30.226	-4.684	-24.707	-3.4727	19.534
-6.3429	30.687	-4.706	-22.971	-4.7748	21.758
-6.689	31.094	-4.755	-21.18	-5.1758	23.934
-7.0186	31.473	-4.838	-19.411	-6.6152	26.06
-7.2932	31.808	-4.991	-17.648	-7.0492	28.098
-7.5459	32.104	-5.162	-15.951	-8.5106	30.026
-7.7876	32.275	-5.376	-14.198	-9.5378	31.838
-8.0018	32.352	-5.689	-12.474	-10.658	33.508
-8.2271	32.269	-6.095	-10.655	-11.702	34.882
-8.5127	32.181	-6.524	-9.128	-12.63	36.041
-8.8478	32.066	-6.908	-7.667	-13.515	36.837
-9.1719	31.962	-7.271	-6.426	-14.405	37.354
-9.507	31.797	-7.595	-5.343	-15.344	37.606
-9.8146	31.687	-7.936	-4.574	-16.432	37.106
-10.117	31.797	-8.331	-4.371	-17.69	35.068
-10.353	31.907	-8.853	-4.426	-19.036	32.168
-10.578	32.258	-9.419	-4.942	-20.458	27.872
-10.814	32.956	-10.007	-6.338	-21.974	23.099
-11.045	33.785	-10.633	-7.964	-23.688	18.869
-11.259	34.785	-11.303	-9.82	-25.572	15.249
-11.397	35.384	-12.05	-11.424	-27.649	12.277
-11.484	35.34	-12.836	-12.545	-30.033	9.4043
-11.506	35.104	-13.654	-13.572	-32.851	7.0587
-11.43	34.697	-14.566	-14.583	-35.932	4.9988
-11.27	34.181	-15.577	-15.577	-39.19	3.7958
-11.094	33.549	-16.675	-16.5	-42.541	3.0981
-10.952	32.775	-17.779	-17.181	-45.749	2.7191
-10.858	31.934	-18.884	-17.621	-48.786	2.439
-10.82	31.11	-19.938	-18.038	-51.692	2.2083
-10.836	30.242	-20.85	-18.34	-54.532	1.9995
-10.869	29.297	-21.663	-18.461	-57.35	1.8402
-10.82	28.243	-22.542	-18.417	-60.174	1.593
-10.369	27.067	-23.904	-18.077	-62.827	1.4502
-9.4575	25.919	-25.832	-17.604	-64.821	1.3074
-8.0952	24.854	-28.898	-17.225	-65.705	1.17
-6.3209	23.782	-31.836	-16.747	-65.574	1.0492
-4.283	22.711	-34.946	-16.22	-64.107	0.93933
-2.3439	21.673	-37.851	-15.605	-61.24	0.84045
-0.81128	20.64	-40.257	-14.978	-58.614	0.74707
0.12805	19.608	-41.993	-14.226	-56.257	0.67017
1.0399	18.619	-43.504	-13.501	-54.115	0.58777
2.0287	17.69	-44.762	-12.825	-52.148	0.50537
2.9076	16.79	-45.558	-12.116	-50.511	0.45593
3.7041	15.971	-45.932	-11.386	-49.034	0.41199
4.4512	15.208	-46.064	-10.754	-47.737	0.36255
5.1488	14.449	-45.943	-10.106	-46.781	0.3241
5.8629	13.647	-45.817	-9.386	-45.738	0.28564
6.599	12.802	-45.674	-8.639	-44.491	0.2417
7.3516	11.939	-45.498	-7.887	-43.008	0.19775
7.1318	11.082	-44.284	-7.123	-41.167	0.1593
9.406	10.225	-45.503	-6.387	-39.119	0.10437
10.307	9.3573	-45.201	-5.667	-37.097	0.054932
11.246	8.5004	-44.872	-4.997	-35.147	0.0054932
12.246	7.6489	-44.531	-4.349	-33.208	-0.032959
13.268	6.8469	-44.141	-3.844	-31.23	-0.076904
14.185	6.1218	-43.509	-3.404	-29.253	-0.065918
15.004	5.4572	-42.724	-3.102	-27.352	-0.076904
15.745	4.8364	-41.708	-2.888	-25.572	-0.082397
16.536	4.2267	-40.647	-2.701	-23.798	-0.076904
17.448	3.5895	-39.631	-2.487	-22.101	-0.076904
18.514	2.9523	-38.664	-2.262	-20.392	-0.049438
19.711	2.337	-37.824	-2.036	-18.541	-0.027466
20.876	1.7548	-36.945	-1.817	-16.597	-0.021973
22.002	1.2054	-36.017	-1.625	-14.493	-0.016479
23.117	0.66711	-35.077	-1.465	-12.29	-0.032959
24.238	0.1178	-34.149	-1.306	-10.032	-0.043945
25.298	-0.42603	-33.16	-1.207	-7.7965	-0.060425
26.276	-0.99182	-32.084	-1.114	-5.6157	-0.076904
27.171	-1.5411	-30.903	-1.07	-3.4679	-0.082397
27.907	-1.9861	-29.529	-1.136	-1.408	-0.065918
28.489	-2.3981	-27.991	-1.251	0.5311	-0.076904
29.011	-2.7826	-26.371	-1.427	2.278	-0.12085
29.549	-3.1616	-24.739	-1.603	3.904	-0.18677
30.044	-3.5571	-23.097	-1.762	5.387	-0.26367
30.544	-3.9691	-21.498	-1.932	6.782	-0.34607
31.066	-4.3756	-19.971	-2.13	7.826	-0.42847
31.565	-4.7766	-18.543	-2.652	8.672	-0.52185
31.961	-5.1611	-17.126	-2.558	9.452	-0.63171
32.153	-5.6995	-15.599	-2.915	10.325	-0.76355
32.252	-6.04	-14.066	-3.168	11.435	-0.91187
32.4	-6.3751	-12.676	-3.437	12.622	-1.0986
32.642	-6.7047	-11.418	-3.75	14.066	-1.3239
32.9	-7.0453	-10.254	-4.069	15.516	-1.5985
33.076	-7.4133	-9.133	-4.366	16.796	-1.9501
33.307	-7.7869	-8.287	-4.673	17.917	-2.4005
33.581	-8.1714	-7.623	-4.981	18.653	-2.9169
33.713	-8.5669	-7.101	-5.277	18.977	-3.5101
33.68	-8.9569	-6.65	-5.569	18.796	-4.2297
33.642	-9.3414	-6.48	-5.86	18.527	-5.1031
33.548	-9.726	-6.502	-6.156	18.258	-6.0645
33.477	-10.099	-6.854	-6.491	17.961	-7.1027
33.477	-10.457	-7.458	-6.887	17.829	-8.2233
33.411	-10.847	-8.15	-7.266	17.401	-9.4098
33.34	-11.215	-9.012	-7.661	16.06	-10.673
33.329	-11.533	-9.853	-8.128	14.237	-12.047
33.494	-11.797	-10.737	-8.678	11.067	-13.645
33.895	-12.044	-11.885	-9.298	7.793	-15.447
34.323	-12.286	-12.984	-9.919	4.898	-17.314
34.29	-12.527	-13.956	-10.474	2.1956	-19.292
34.246	-12.731	-15.165	-11.122	0.3718	-21.533
33.999	-12.978	-16.62	-11.781	-0.8037	-23.983
33.537	-13.203	-18.01	-12.457	-1.4354	-26.57
32.768	-13.373	-18.977	-13.237	-1.6277	-29.235
31.928	-13.478	-19.768	-14.116	-1.8969	-31.926
30.961	-13.582	-20.361	-14.978	-2.1495	-34.717
29.928	-13.654	-20.768	-15.841	-2.3198	-37.54
28.973	-13.681	-21.004	-16.72	-2.5121	-40.364
28.039	-13.692	-21.229	-17.538	-3.2537	-43.182
27.039	-13.566	-21.454	-18.604	-3.8799	-45.978
25.94	-12.731	-21.498	-20.57	-4.0612	-48.373
24.831	-11.379	-21.13	-23.29	-4.0667	-50.372
23.749	-9.5831	-20.806	-26.602	-4.2754	-52.042
22.628	-7.4408	-20.438	-30.271	-4.4622	-53.575
21.573	-5.1996	-20.01	-34.204	-4.5995	-54.531
20.585	-3.3319	-19.559	-37.737	-4.7643	-54.739
19.684	-1.9366	-19.153	-40.692	-4.9126	-54.305
18.832	-0.87646	-18.818	-43.092	-5.0389	-53.476
17.981	0.018921	-18.384	-45.037	-5.1378	-51.938
17.14	0.92529	-17.933	-46.833	-5.2092	-50.12
16.196	1.7548	-17.334	-48.218	-5.2312	-48.29
15.295	2.3535	-16.774	-48.91	-5.2477	-46.516
14.388	2.9907	-16.285	-49.179	-5.2751	-44.841
13.438	3.6938	-15.676	-49.349	-5.3026	-43.308
12.559	4.4629	-15.121	-49.3	-5.2532	-41.94
11.686	5.3473	-14.527	-49.256	-5.2257	-40.529
10.796	6.2976	-13.967	-49.146	-5.2532	-38.804
9.851	7.3303	-13.368	-49.014	-5.2697	-36.821
8.8567	8.4399	-12.671	-48.783	-5.2532	-34.437
7.8514	9.577	-11.94	-48.487	-5.2477	-31.844
6.8737	10.714	-11.232	-48.031	-5.2532	-29.02
5.9124	11.901	-10.594	-47.542	-5.2587	-26.109
4.984	13.109	-10.166	-46.932	-5.1927	-23.181
4.0667	14.345	-9.584	-46.229	-5.0334	-20.319
3.1493	15.559	-8.996	-45.4	-4.8082	-17.628
2.2319	16.751	-8.419	-44.477	-4.5391	-15.04
1.3256	17.905	-7.892	-43.427	-4.3248	-12.519
0.4906	18.954	-7.37	-42.208	-4.2699	-9.9701
-0.28943	19.932	-6.892	-40.78	-4.3193	-7.4048
-1.053	20.909	-6.436	-39.291	-4.3798	-4.856
-1.833	21.893	-5.969	-37.764	-4.4402	-2.3401
-2.6405	22.909	-5.464	-36.27	-4.5006	0.17578
-3.426	23.958	-4.969	-34.814	-4.5391	2.7026
-4.217	25.073	-4.486	-33.446	-4.572	5.202
-4.9366	26.183	-4.019	-32.117	-4.5281	7.619
-5.5629	27.243	-3.722	-30.766	-4.4841	9.8602
-6.0298	28.221	-3.591	-29.398	-4.4677	11.838
-6.4802	29.105	-3.492	-27.975	-4.5116	11.838
-6.8977	29.935	-3.459	-26.591	-4.627	15.419
-7.2987	30.72	-3.481	-25.234	-4.8192	17.062
-7.6997	31.467	-3.536	-23.976	-5.0774	18.644
-8.0897	32.198	-3.618	-22.784	-5.396	20.176
-8.4523	32.901	-3.755	-21.691	-5.764	21.66
-8.7874	33.549	-3.926	-20.614	-6.1486	23.082
-9.1279	34.109	-4.107	-19.538	-6.5386	24.483
-9.452	34.62	-4.327	-18.5	-7	25.895
-9.7432	35.005	-4.623	-17.467	-7.5493	27.345
-10.018	35.17	-4.931	-16.297	-8.994	28.911
-10.281	35.054	-5.293	-14.989	-10.268	30.498
-10.518	34.829	-5.766	-13.671	-11.543	32.036
-10.743	34.725	-6.359	-12.237	-12.795	33.475
-11.007	34.401	-6.93	-10.996	-14.075	34.722
-11.254	34.027	-7.507	-9.842	-15.448	35.321
-11.501	33.78	-8.057	-8.941	-16.893	34.849
-11.682	33.654	-8.71	-8.793	-18.453	33.212
-11.88	33.494	-9.38	-8.821	-20.217	26.917
-12.155	33.104	-10.034	-8.595	-22.002	21.209
-12.363	33.143	-10.759	-8.892	-23.848	16.364
-12.545	33.258	-11.495	-9.342	-25.781	12.415
-12.72	33.73	-12.209	-10.677	-27.852	9.1187
-12.792	34.219	-13.011	-12.364	-30.225	6.3666
-12.847	34.131	-13.808	-13.709	-32.818	4.3671
-12.885	33.873	-14.621	-15.127	-35.614	3.5156
-12.863	33.313	-15.511	-16.209	-38.756	3.0048
-12.77	32.533	-16.51	-16.863	-42.013	2.6367
-12.671	31.621	-17.521	-17.275	-45.188	2.3621
-12.627	30.665	-18.444	-17.522	-48.199	2.1149
-12.638	29.709	-19.208	-17.698	-51.088	1.9006
-12.682	28.809	-19.845	-17.829	-54.005	1.7139
-12.704	27.88	-20.57	-17.84	-56.894	1.5765
-12.16	26.902	-21.982	-17.632	-59.581	1.4282
-11.177	25.842	-24.047	-17.313	-61.58	1.2799
-9.6333	24.667	-26.783	-16.588	-62.635	1.1536
-7.8206	23.552	-29.804	-15.846	-62.712	1.0272
-5.6398	22.508	-33.221	-15.193	-61.619	0.90637
-3.6128	21.481	-36.302	-14.424	-59.234	0.802
-2.2999	20.459	-38.527	-13.578	-57.037	0.70862
-1.0969	19.492	-40.499	-12.787	-55.126	0.60974
0.001709	18.564	-42.306	-11.979	-53.351	0.51086
0.88062	17.657	-43.603	-11.216	-51.874	0.41748
1.5728	16.702	-44.284	-10.32	-50.583	0.32959
2.155	15.79	-44.581	-9.507	-49.231	0.24719
2.7208	14.894	-44.635	-8.705	-47.858	0.20325
3.2921	14.07	-44.388	-7.92	-46.628	0.17029
3.9128	13.318	-44.108	-7.337	-45.392	0.13184
4.627	12.494	-43.806	-6.678	-44.046	0.087891
5.4509	11.664	-43.575	-5.953	-42.651	0.054932
6.3353	10.857	-43.4	-5.272	-41.184	0.021973
7.2527	10.132	-43.257	-4.75	-39.646	-0.0054932
8.236	9.4122	-43.185	-4.245	-37.778	-0.032959
9.2357	8.6981	-43.141	-3.822	-35.674	-0.082397
10.241	7.9895	-43.021	-3.547	-33.433	-0.13733
11.213	7.2424	-42.795	-3.272	-31.296	-0.18127
12.169	6.4734	-42.328	-2.965	-29.203	-0.20325
13.097	5.7043	-41.713	-2.69	-27.165	-0.19226
13.927	4.9902	-40.823	-2.432	-25.243	-0.15381
14.723	4.3201	-39.802	-2.245	-23.381	-0.12634
15.597	3.6224	-38.769	-1.993	-21.502	-0.10437
16.608	2.9358	-37.851	-1.701	-19.645	-0.087891
17.772	2.2766	-37.022	-1.465	-17.629	-0.076904
19.019	1.6449	-36.363	-1.284	-15.394	-0.076904
20.145	1.0077	-35.528	-1.097	-12.801	-0.071411
21.117	0.40894	-34.473	-0.976	-10.345	-0.071411
22.084	-0.20081	-33.391	-0.855	-8.0327	-0.087891
23.073	-0.80505	-32.331	-0.757	-5.7421	-0.10437
23.919	-1.4258	-31.073	-0.647	-3.4899	-0.10986
24.644	-2.063	-29.656	-0.526	-1.2651	-0.12085
25.32	-2.6727	-28.151	-0.487	0.8168	-0.12085
25.979	-3.1946	-26.579	-0.498	2.7394	-0.098877
26.72	-3.667	-25.135	-0.57	4.904	-0.10437
27.413	-4.0955	-23.663	-0.674	7.238	-0.10437
28.044	-4.7437	-22.146	-0.531	9.584	-0.12085
28.539	-5.1117	-20.471	-0.696	11.693	-0.14282
28.846	-5.4742	-18.647	-0.894	13.632	-0.19775
29.126	-5.8313	-16.807	-1.141	15.522	-0.26917
29.363	-6.1774	-14.863	-1.438	17.34	-0.35706
29.511	-6.5179	-13.077	-1.789	18.856	-0.46692
29.379	-6.8695	-11.27	-2.146	19.977	-0.67017
29.291	-7.2375	-9.562	-2.481	20.79	-0.98328
29.5	-7.5891	-8.183	-2.844	21.46	-1.4832
29.874	-7.8967	-7.189	-3.355	22.213	-2.0874
30.406	-8.2263	-6.656	-3.855	22.526	-2.8564
30.807	-8.5724	-7.222	-4.322	22.432	-3.7738
31.038	-8.8745	-5.623	-4.915	21.729	-4.9109
31.109	-9.1602	-5.579	-5.646	20.378	-6.1578
31.055	-9.4623	-5.887	-6.415	18.104	-7.597
31.022	-9.7754	-6.54	-7.178	15.313	-9.1736
31.164	-10.078	-7.705	-7.964	12.111	-10.97
31.346	-10.38	-8.99	-8.777	8.848	-12.92
31.554	-10.66	-10.446	-9.628	6.129	-15.062
31.95	-10.934	-12.209	-10.479	4.019	-17.281
31.972	-11.187	-13.945	-11.386	2.3494	-19.671
31.802	-11.429	-15.665	-12.287	1.432	-22.225
31.406	-11.643	-17.142	-13.215	0.1134	-24.961
30.813	-11.813	-18.175	-14.176	0.8717	-27.911
30.121	-11.951	-18.955	-15.171	0.608	-30.938
29.39	-12.115	-19.658	-16.072	0.3169	-33.986
28.61	-12.297	-20.191	-16.939	0.1281	-37.024
27.759	-12.489	-20.603	-17.763	0.8861	-39.979
26.847	-12.676	-21.015	-18.494	0.6002	-42.792
25.858	-12.544	-21.196	-19.516	0.8419	-45.516
24.825	-11.923	-21.158	-21.076	0.9738	-47.988
23.793	-10.638	-21.042	-23.619	0.188	-49.878
22.672	-8.6603	-20.79	-27.239	0.4407	-51.152
21.562	-6.6608	-20.438	-31.024	0.5835	-51.899
20.546	-4.6063	-20.109	-34.792	0.6934	-52.125
19.684	-2.6672	-19.872	-38.176	0.8417	-51.757
18.893	-1.662	-19.68	-40.17	0.979	-51.669
18.239	-0.64026	-19.532	-42.082	0.0559	-51.476
17.607	0.354	-19.356	-43.839	0.2262	-50.768
16.855	1.4032	-19.048	-45.345	0.4514	-49.515
15.965	2.5732	-18.461	-46.877	0.5887	-48.373
15.075	3.5345	-17.9	-47.69	0.5997	-47.28
14.191	4.3805	-17.362	-48.102	0.6766	-46.115
13.284	5.2045	-16.769	-48.377	0.748	-44.951
12.411	6.001	-16.181	-48.476	0.8085	-43.544
11.532	6.6711	-15.522	-48.234	0.9513	-41.83
10.653	7.3248	-14.846	-47.855	0.16	-39.792
9.774	8.0225	-14.225	-47.448	0.4017	-37.288
8.9006	8.775	-13.621	-46.976	0.6544	-34.453
7.9668	9.5935	-12.995	-46.399	0.9126	-31.514
7.0385	10.456	-12.407	-45.757	0.1104	-28.603
6.0936	11.384	-11.803	-45.086	0.2751	-25.878
5.1873	12.439	-11.243	-44.449	1.396	-23.357
4.2919	13.516	-10.721	-43.757	1.4729	-21.094
3.4185	14.614	-10.232	-43.037	1.4894	-18.951
2.6549	15.74	-9.825	-42.318	1.4454	-16.848
1.9573	16.888	-9.496	-41.56	1.3795	-14.705
1.3256	18.004	-9.287	-40.697	1.363	-12.469
0.71582	19.009	-9.111	-39.67	2.3795	-10.206
0.10608	19.948	-8.941	-38.528	2.418	-7.9211
-0.4762	20.893	-8.804	-37.275	2.4674	-5.6085
-1.0585	21.898	-8.672	-36.067	2.5608	-3.2574
-1.6407	23.112	-8.562	-35.067	3.6597	-0.91736
-2.2395	24.304	-8.469	-34.084	3.7531	1.3348
-2.8602	25.403	-8.414	-33.023	3.819	3.4222
-3.426	26.397	-8.326	-31.908	2.8409	5.3888
-3.9698	27.32	-8.282	-30.744	2.9453	7.3224
-4.5027	28.16	-8.26	-29.502	1.1046	9.256
-4.9971	28.831	-8.298	-28.085	0.2749	11.228
-5.4695	29.407	-8.375	-26.536	-0.4232	13.282
-5.9529	29.924	-8.43	-24.921	-1.566	15.403
-6.4253	30.44	-8.463	-23.306	-2.7034	17.584
-6.8647	31.044	-8.501	-21.806	-3.8846	19.737
-7.2822	31.725	-8.567	-20.439	-4.1648	22.731
-7.6887	32.352	-8.628	-19.016	-5.5273	23.615
-8.0623	32.978	-8.738	-17.692	-6.0107	25.664
-8.3699	33.472	-8.952	-16.527	-7.5601	26.62
-8.6555	34.044	-9.249	-15.478	-8.2357	27.213
-8.9247	34.395	-9.584	-14.281	-9.9773	27.543
-9.1884	34.659	-9.924	-13.056	-10.834	27.773
-9.4191	34.906	-10.32	-11.968	-11.752	27.85
-9.6443	34.977	-10.759	-10.952	-12.757	27.746
-9.9135	35.115	-11.182	-10.172	-13.834	27.257
-10.216	35.313	-11.622	-9.656	-15.037	26.422
-10.562	35.626	-12.056	-9.705	-16.316	25.093
-11.116	36.104	-12.253	-10.403	-17.701	22.714
-10.023	36.505	-14.05	-11.303	-19.178	19.517
-11.638	36.796	-13.127	-12.325	-20.843	15.738
-11.803	36.977	-13.66	-13.325	-22.656	12.03
-11.918	37.268	-14.247	-14.737	-24.715	8.9484
-11.973	37.773	-14.934	-16.61	-26.962	6.5094
-11.957	38.103	-15.719	-18.532	-29.489	5.2075
-11.88	38.054	-16.598	-20.323	-32.197	4.5209
-11.765	37.444	-17.51	-21.361	-35.235	4.1364
-11.572	36.609	-18.548	-22.026	-38.514	3.8342
-11.314	35.735	-19.702	-22.575	-41.98	3.5266
-11.067	34.906	-20.932	-23.119	-45.496	3.2465
-10.864	34.016	-22.163	-23.476	-48.951	3.0212
-10.693	33.06	-23.328	-23.647	-52.302	2.8345
-10.556	32.121	-24.404	-23.795	-55.691	2.6477
-10.408	31.198	-25.333	-23.888	-59.185	2.4774
-10.232	30.286	-26.162	-23.932	-62.904	2.3126
-9.9244	29.116	-27.019	-23.608	-66.799	2.1313
-9.2048	27.908	-28.304	-23.103	-70.737	1.9501
-7.6393	26.732	-30.672	-22.564	-74.165	1.7633
-5.6892	25.612	-33.721	-21.982	-76.027	1.5985
-3.5579	24.54	-37.06	-21.427	-76.362	1.4337
-1.2507	23.502	-40.483	-20.889	-74.143	1.2909
0.72131	22.486	-43.438	-20.323	-70.754	1.1536
2.2649	21.552	-46.02	-19.851	-66.722	1.0437
3.5503	20.64	-48.041	-19.373	-62.789	0.93933
4.561	19.761	-49.695	-18.851	-59.652	0.85693
5.4564	18.855	-51.123	-18.28	-56.927	0.78552
6.3683	17.982	-52.117	-17.632	-54.455	0.78003
7.0989	17.207	-52.568	-17.099	-52.549	0.79651
7.7635	16.476	-52.656	-16.654	-51.193	0.76355
8.5161	15.707	-52.546	-16.176	-50.011	0.74158
9.3566	14.807	-52.414	-15.478	-49.105	0.7196
10.312	13.922	-52.309	-14.847	-48.193	0.64819
11.29	13.054	-52.183	-14.27	-46.545	0.57678
12.284	12.175	-51.98	-13.649	-44.375	0.51636
13.29	11.324	-51.722	-13.111	-44.375	0.47241
14.333	10.445	-51.392	-12.578	-38.998	0.43396
15.372	9.5605	-51.019	-12.029	-36.295	0.41199
16.388	8.6652	-50.458	-11.468	-33.669	0.401
17.388	7.7917	-49.733	-10.919	-31.12	0.39001
18.36	6.9733	-48.799	-10.43	-28.852	0.42847
19.354	6.2042	-47.849	-9.991	-26.819	0.44495
20.403	5.4022	-46.926	-9.568	-24.748	0.43396
21.557	4.5123	-46.064	-9.029	-22.485	0.41748
22.743	3.6664	-45.234	-8.474	-19.849	0.44495
23.864	2.8699	-44.344	-7.98	-15.696	0.44495
24.891	2.0844	-43.306	-7.541	-13.13	0.43945
25.902	1.2769	-42.191	-7.052	-10.763	0.43396
26.913	0.45837	-41.048	-6.546	-8.5601	0.42297
27.885	-0.37109	-39.834	-6.041	-6.5056	0.39001
28.813	-1.1896	-38.549	-5.563	-4.3468	0.36804
29.648	-1.9421	-37.148	-5.168	-2.0671	0.39001
30.406	-2.5189	-35.66	-4.948	0.24	0.46692
31.071	-3.0078	-34.061	-4.887	2.5636	0.47241
31.598	-3.7329	-32.325	-4.618	4.909	0.45044
32.06	-2.7881	-30.54	-6.036	7.326	0.39001
32.455	-4.6448	-28.672	-4.651	9.787	0.27466
32.719	-5.0183	-26.695	-4.75	12.297	0.12085
32.944	-5.3864	-24.756	-4.909	14.72	-0.076904
33.087	-5.7214	-22.784	-5.113	16.939	-0.38452
33.208	-6.0455	-20.773	-5.376	18.988	-0.88989
33.433	-6.3916	-19.109	-5.662	20.576	-1.5271
33.614	-6.7102	-17.785	-6.074	21.235	-2.2906
33.686	-7.0947	-16.467	-6.475	20.933	-3.0872
33.955	-7.4847	-15.494	-6.865	20.274	-3.9606
34.361	-7.8528	-15.093	-7.288	19.384	-4.9054
34.883	-8.2428	-15.055	-7.782	18.362	-6.0095
35.361	-8.6493	-15.417	-8.293	16.555	-7.196
35.762	-9.0613	-16.071	-8.771	14.176	-8.5364
35.943	-9.4238	-17.065	-9.287	11.408	-10.047
35.987	-9.7314	-18.246	-9.892	8.612	-11.865
35.823	-10.017	-19.383	-10.545	6.491	-13.87
35.537	-10.264	-20.444	-11.254	4.7	-16.051
35.125	-10.479	-21.603	-11.99	3.256	-18.309
34.691	-10.643	-22.844	-12.77	2.5197	-20.852
34.065	-10.781	-23.789	-13.578	2.1846	-23.588
33.307	-10.88	-24.47	-14.462	1.9044	-26.598
32.455	-10.945	-25.03	-15.396	1.6188	-29.762
31.56	-11.028	-25.453	-16.291	1.476	-32.992
30.599	-11.077	-25.657	-17.203	1.075	-36.222
29.659	-11.088	-25.783	-18.153	0.4652	-39.38
28.714	-11.094	-25.915	-19.131	-0.1665	-42.457
27.852	-11.121	-26.118	-20.054	-0.4741	-45.412
26.841	-10.912	-25.909	-21.136	-0.5565	-48.279
25.891	-10.231	-25.712	-22.801	-0.6279	-50.735
25.034	-8.9789	-25.646	-25.306	-0.7433	-52.745
24.188	-7.0398	-25.607	-28.942	-0.8147	-54.146
23.326	-4.7821	-25.475	-32.837	-0.8092	-55.02
22.507	-2.5629	-25.338	-36.594	-0.7982	-55.014
21.689	-0.80505	-25.102	-40	-0.8037	-54.657
20.799	0.084839	-24.684	-41.73	-0.8861	-54.261
19.964	0.92529	-24.256	-43.307	-0.8751	-53.278
19.09	1.6339	-23.707	-44.328	-0.8312	-51.696
18.19	2.326	-23.02	-45.257	-0.8861	-49.867
17.261	3.0841	-22.201	-45.905	-0.9136	-47.807
16.355	3.6993	-21.471	-45.861	-0.9905	-45.577
15.427	4.3256	-20.773	-45.735	-1.0454	-43.38
14.438	5.0012	-19.966	-45.454	-1.0619	-41.364
13.405	5.6055	-19.026	-44.971	-1.1058	-39.304
12.367	6.2646	-18.087	-44.449	-1.1718	-37.172
11.351	6.9733	-17.164	-43.938	-1.2102	-34.904
10.356	7.7203	-16.263	-43.362	-1.2706	-32.338
9.4005	8.5443	-15.461	-42.785	-1.3201	-29.526
8.3788	9.4672	-14.588	-42.224	-1.2981	-26.631
7.3735	10.461	-13.703	-41.626	-1.2542	-23.741
6.4177	11.489	-12.847	-40.956	-1.2047	-20.929
5.5059	12.598	-11.984	-40.329	-1.1937	-18.287
4.627	13.741	-11.149	-39.692	-1.2157	-15.771
3.77	14.856	-10.309	-38.912	-1.2487	-13.359
2.9131	15.96	-9.474	-38.006	-1.2871	-11.019
2.1385	17.07	-8.644	-37.055	-1.2816	-8.6572
1.4904	18.152	-7.996	-36.012	-1.3475	-6.2512
0.86414	19.141	-7.496	-34.737	-1.4409	-3.7848
0.21045	20.02	-7.024	-33.271	-1.5178	-0.060425
-0.53113	20.805	-6.48	-31.678	-1.5508	2.3785
-1.2288	21.58	-6.008	-30.052	-1.5673	4.8395
-1.8275	22.409	-5.672	-28.47	-1.5068	7.3444
-2.3329	23.244	-5.453	-26.893	-1.4409	9.8712
-2.6844	24.046	-5.447	-25.295	-1.397	12.387
-3.0415	24.777	-5.475	-23.641	-1.3805	14.875
-3.4205	25.359	-5.513	-21.861	-1.3695	17.336
-3.7996	25.853	-5.563	-20.005	-1.342	19.753
-4.1566	26.249	-5.64	-18.055	-1.2981	22.094
-4.5027	26.6	-5.738	-16.061	-1.2706	24.351
-4.8378	26.902	-6.095	-14.006	-1.3146	26.455
-5.1729	27.325	-6.222	-12.155	-1.4409	28.378
-4.2775	27.562	-7.573	-10.238	-1.6936	30.092
-5.9858	27.611	-6.332	-8.134	-2.0562	31.558
-6.277	28.034	-6.584	-6.431	-2.6	32.888
-6.5681	28.446	-6.903	-4.778	-3.2372	34.189
-6.8867	28.677	-7.255	-3.036	-3.9458	35.475
-7.2383	28.798	-7.54	-1.289	-4.6105	36.65
-7.5184	28.896	-7.815	0.2212	-5.385	37.524
-7.7766	28.979	-8.078	1.3802	-6.5441	38.167
-7.8975	29.072	-8.683	2.2592	-7.7581	38.535
-8.0897	29.177	-9.227	2.9678	-8.8127	38.474
-8.4028	29.138	-9.6	3.4677	-9.9443	38.337
-8.6335	29.111	-10.1	3.6819	-11.142	37.628
-8.8752	29.358	-10.633	3.3413	-12.372	36.041
-9.1609	30.061	-11.155	2.2097	-13.647	33.245
-9.507	30.825	-11.671	0.6332	-14.987	29.169
-9.8365	31.632	-12.231	-1.031	-16.388	24.829
-10.183	32.538	-12.759	-2.871	-17.937	20.676
-10.501	33.665	-13.286	-5.085	-19.557	17.369
-10.754	34.917	-13.808	-7.64	-21.343	14.848
-10.979	36.312	-14.302	-10.529	-23.337	12.64
-11.155	37.004	-14.802	-12.638	-25.693	10.492
-11.248	36.647	-15.368	-13.49	-28.292	8.399
-11.259	36.142	-15.989	-14.165	-31.269	6.4874
-11.16	35.604	-16.747	-14.962	-34.427	4.9878
-11.001	34.994	-17.615	-15.714	-37.685	4.1034
-10.809	34.302	-18.559	-16.368	-40.904	3.7134
-10.628	33.632	-19.532	-16.983	-44.024	3.4717
-10.479	32.906	-20.553	-17.445	-47.089	3.2739
-10.358	32.104	-21.559	-17.807	-50.138	3.0872
-10.21	31.286	-22.564	-18.12	-53.187	2.9279
-10.078	30.374	-23.476	-18.23	-56.213	2.7631
-9.9904	29.319	-24.168	-18.088	-59.262	2.5928
-9.6992	28.171	-25.063	-17.714	-62.377	2.4335
-9.084	27.012	-26.332	-17.242	-65.552	2.2961
-7.9854	25.875	-28.244	-16.813	-68.018	2.1478
-6.244	24.738	-31.089	-16.28	-69.743	2.0215
-4.3544	23.59	-34.215	-15.665	-70.572	1.9171
-2.4647	22.469	-37.22	-15.05	-69.386	1.8127
-0.74536	21.382	-39.922	-14.479	-66.507	1.7029
0.39722	20.322	-42.153	-13.775	-63.195	1.6205
1.3475	19.3	-43.801	-13.122	-59.811	1.5381
2.2374	18.344	-45.317	-12.495	-56.592	1.4557
3.1383	17.416	-46.651	-11.864	-54.148	1.3843
3.9733	16.581	-47.69	-11.232	-51.945	1.3513
4.7258	15.834	-48.245	-10.76	-49.792	1.3129
5.4894	15.131	-48.58	-10.276	-47.726	1.2689
6.22	14.395	-48.64	-9.71	-45.985	1.2469
7	13.587	-48.492	-9.057	-44.375	1.214
7.8075	12.774	-48.338	-8.442	-42.771	1.17
8.626	11.923	-48.107	-7.821	-41.019	1.1316
9.4609	11.055	-47.827	-7.162	-39.036	1.0822
10.34	10.181	-47.481	-6.524	-36.954	1.0382
11.263	9.3024	-47.129	-5.904	-34.735	0.98877
12.213	8.4125	-46.695	-5.272	-32.362	0.9613
13.202	7.5281	-46.19	-4.717	-30.038	0.92834
14.3	6.759	-45.652	-4.283	-27.764	0.95032
15.41	6.0339	-45.064	-3.954	-25.517	0.97229
16.366	5.3088	-44.218	-3.635	-23.265	0.99976
17.223	4.5892	-43.207	-3.289	-21.063	1.0107
18.047	3.9026	-42.048	-2.987	-18.92	1.0217
18.898	3.2489	-40.906	-2.74	-16.849	1.0272
20.024	2.6007	-39.911	-2.498	-14.822	1.0327
21.183	1.958	-38.956	-2.234	-12.757	1.0382
22.205	1.3593	-37.835	-2.031	-10.708	1.0327
23.155	0.77148	-36.621	-1.828	-8.6425	1.0327
24.1	0.16174	-35.391	-1.619	-6.4507	1.0052
25.051	-0.81604	-34.182	-1.053	-4.2479	0.97229
25.979	0.095825	-32.952	-2.405	-2.1495	1.0052
26.88	-1.7389	-31.694	-1.075	-0.1226	1.0327
27.704	-2.1674	-30.342	-1.213	1.8605	1.0547
28.39	-2.6178	-28.87	-1.333	3.723	1.0382
28.956	-3.0463	-27.288	-1.465	5.524	1.0217
29.412	-3.4308	-25.591	-1.679	7.31	0.99426
29.912	-3.8318	-23.932	-1.905	9.188	0.95581
30.346	-4.2383	-22.196	-2.119	11.083	0.91736
30.763	-4.6448	-20.449	-2.35	12.924	0.87341
31.082	-5.0403	-18.686	-2.619	14.66	0.79651
31.324	-5.4358	-16.944	-2.904	16.445	0.67566
31.527	-5.8368	-15.231	-3.185	18.302	0.51086
31.659	-6.2378	-13.517	-3.498	19.971	0.30762
31.692	-6.6168	-11.77	-3.833	21.361	0.093384
31.813	-6.9958	-10.177	-4.146	22.35	-0.14832
31.988	-7.3804	-8.727	-4.481	23.119	-0.51086
32.203	-7.7704	-7.463	-4.849	23.509	-0.99426
32.439	-8.1824	-6.573	-5.206	23.85	-1.5436
32.724	-8.6053	-6.15	-5.536	24.234	-2.1478
33.093	-9.0228	-6.03	-5.843	24.613	-2.8784
33.461	-9.4293	-6.189	-6.151	24.981	-3.7848
33.521	-9.8303	-6.227	-6.469	24.915	-4.812
33.378	-10.176	-6.26	-6.887	23.553	-5.9711
33.279	-10.5	-6.502	-7.403	23.553	-7.2565
33.241	-10.819	-6.936	-7.942	17.5	-8.6188
33.45	-11.088	-7.809	-8.584	13.72	-10.129
33.697	-11.352	-8.815	-9.266	10.194	-11.766
34.07	-11.638	-10.221	-9.952	7.117	-13.651
34.224	-11.951	-11.523	-10.562	4.975	-15.683
34.004	-12.231	-12.599	-11.172	3.223	-18.001
33.697	-12.423	-13.742	-11.875	1.8989	-20.561
33.18	-12.604	-14.972	-12.644	1.064	-23.445
32.477	-12.764	-15.247	-13.495	0.7728	-26.483
31.653	-12.874	-15.813	-14.418	0.5641	-29.559
30.791	-12.956	-17.719	-15.374	0.2784	-32.668
29.802	-13.044	-17.95	-16.357	0.0752	-35.821
28.846	-13.121	-18.115	-17.351	-0.172	-38.947
27.978	-13.187	-18.362	-18.313	-0.7268	-42.001
27.05	-13.187	-18.636	-19.28	-1.5013	-44.978
25.957	-13.005	-18.653	-20.461	-1.9298	-47.889
24.814	-12.396	-18.296	-22.273	-2.1111	-50.647
23.732	-10.907	-17.972	-25.229	-2.2814	-52.657
22.721	-8.9185	-17.763	-28.788	-2.5341	-54.316
21.843	-6.8036	-17.659	-32.425	-2.7318	-55.739
20.986	-4.5184	-17.461	-36.144	-2.8252	-57.09
20.195	-2.6563	-17.307	-39.439	-3.001	-57.986
19.519	-1.1951	-17.269	-42.34	-3.1108	-58.414
18.893	-0.10193	-17.197	-44.598	-3.1603	-58.019
18.305	0.88135	-17.093	-46.487	-3.1768	-56.849
17.745	2.0789	-17.016	-48.492	-3.1713	-54.146
17.151	3.0621	-16.922	-50.135	-3.1053	-52.306
16.52	3.7158	-16.818	-50.816	-2.9735	-50.427
15.795	4.4025	-16.543	-51.068	-2.8032	-48.565
14.982	5.2155	-16.115	-51.283	-2.5615	-46.879
14.125	6.0339	-15.61	-51.288	-2.4132	-45.121
13.224	6.9513	-15.005	-51.162	-2.4187	-43.259
12.306	7.951	-14.357	-51.052	-2.4132	-41.215
11.373	8.9563	-13.693	-50.904	-2.4517	-38.749
10.472	9.9176	-13.11	-50.662	-2.545	-36.035
9.5488	10.945	-12.522	-50.343	-2.6	-33.019
9.6202	12.043	-12.885	-49.948	-2.6	-29.888
7.3406	13.208	-10.858	-49.503	-2.6	-26.658
6.5441	14.406	-10.364	-48.992	-2.6329	-23.511
5.819	15.576	-9.957	-48.327	-2.6604	-20.687
5.1653	16.724	-9.704	-47.564	-2.6934	-18.067
4.5775	17.789	-9.545	-46.657	-2.7043	-15.623
3.9788	18.811	-9.375	-45.641	-2.6934	-13.206
3.38	19.761	-9.199	-44.449	-2.6714	-10.778
2.7648	20.662	-9.034	-43.087	-2.6769	-8.3331
2.1385	21.58	-8.853	-41.67	-2.6879	-5.8832
1.4958	22.53	-8.655	-40.252	-2.7263	-3.4222
0.8147	23.546	-8.425	-38.89	-2.7867	-0.90088
0.045654	24.584	-8.084	-37.577	-2.7922	1.6589
-0.67944	25.617	-7.76	-36.281	-2.7648	4.2957
-1.3221	26.655	-7.496	-35.006	-2.6989	6.9049
-1.8715	27.611	-7.342	-33.655	-2.6604	9.3988
-2.3109	28.501	-7.342	-32.26	-2.6714	11.783
-2.7559	29.303	-7.386	-30.782	-2.6989	14.035
-3.1953	29.979	-7.43	-29.184	-2.7043	16.221
-3.6238	30.594	-7.485	-27.53	-2.7263	18.386
-4.0413	31.187	-7.573	-25.849	-2.7867	20.583
-4.4587	31.758	-7.683	-24.157	-2.8746	22.857
-4.8762	32.291	-7.776	-22.433	-3.0284	25.153
-5.2717	32.753	-7.87	-20.642	-3.2592	27.345
-5.6233	33.17	-8.024	-18.835	-3.6052	29.388
-5.9639	33.538	-8.199	-17.055	-3.9788	31.135
-6.299	33.857	-8.392	-15.286	-4.3633	32.695
-6.634	34.142	-8.606	-13.622	-4.8027	34.036
-6.9911	34.329	-8.782	-11.963	-5.385	35.288
-7.3591	34.45	-8.864	-10.37	-6.3793	36.475
-7.6283	34.401	-9.106	-8.705	-7.4669	37.612
-7.87	34.368	-9.496	-7.277	-8.4337	38.589
-8.2435	34.252	-9.82	-6.003	-9.3401	39.419
-8.6226	34.071	-10.133	-4.942	-10.213	40.001
-8.9302	33.873	-10.468	-4.085	-11.153	40.172
-9.2158	33.73	-10.803	-3.003	-12.213	39.974
-9.4465	33.714	-11.232	-2.663	-13.471	39.792
-9.6443	33.807	-11.775	-3.047	-14.855	38.979
-9.8695	34.45	-12.352	-4.377	-16.36	35.711
-10.144	34.489	-12.88	-5.129	-17.931	30.992
-10.303	34.258	-13.55	-5.376	-19.662	26.23
-10.54	34.302	-14.181	-5.744	-21.672	21.863
-10.661	34.906	-15.022	-6.81	-23.826	18.254
-10.803	35.543	-15.835	-8.387	-26.105	15.178
-10.957	35.488	-16.538	-9.419	-28.528	12.349
-11.051	35.291	-17.258	-10.436	-31.258	9.8108
-11.045	34.802	-17.994	-11.144	-34.449	7.6135
-10.957	34.23	-18.801	-11.858	-37.872	5.993
-10.792	33.687	-19.74	-12.787	-41.409	5.0098
-10.578	33.033	-20.74	-13.567	-44.941	4.4659
-10.364	32.187	-21.751	-14.045	-48.375	4.2133
-10.144	31.33	-22.762	-14.363	-51.775	4.0155
-9.9189	30.451	-23.745	-14.682	-55.142	3.8287
-9.7102	29.523	-24.64	-14.841	-58.449	3.6694
-9.5289	28.386	-25.404	-14.715	-61.756	3.4882
-9.3477	27.155	-26.096	-14.242	-65.063	3.3508
-9.1169	25.98	-26.827	-13.693	-68.397	3.219
-8.5017	24.832	-27.92	-13.177	-71.55	3.0927
-7.1724	23.705	-29.98	-12.633	-73.539	2.9773
-5.4475	22.568	-32.649	-11.963	-74.467	2.8784
-3.5194	21.453	-35.676	-11.26	-73.885	2.774
-1.7561	20.377	-38.39	-10.573	-71.127	2.6807
-0.1521	19.311	-40.796	-9.848	-67.419	2.5983
1.1278	18.284	-42.982	-9.101	-63.514	2.5104
2.2649	17.317	-44.938	-8.376	-59.679	2.4225
3.1438	16.394	-46.47	-7.645	-56.466	2.3346
3.9128	15.532	-47.486	-6.942	-53.95	2.2961
4.7313	14.834	-48.321	-6.448	-51.615	2.2357
5.5553	14.147	-48.931	-5.97	-49.407	2.1918
6.3188	13.472	-49.145	-5.508	-47.556	2.1478
7.0659	12.763	-49.057	-5.014	-46.194	2.0929
7.8514	11.972	-48.904	-4.421	-45.068	2.0435
8.6809	11.154	-48.739	-3.805	-43.953	2.005
9.5653	10.352	-48.618	-3.223	-42.508	1.9611
10.428	9.5441	-47.838	-2.668	-40.508	1.9226
11.323	8.7146	-47.569	-2.091	-38.19	1.8732
12.257	7.8961	-47.256	-1.575	-35.658	1.8347
13.229	7.0941	-46.866	-1.141	-33.027	1.8018
14.224	6.0339	-46.355	-0.482	-30.522	1.8182
15.141	5.3857	-45.569	-0.339	-28.226	1.8292
16.036	4.7211	-44.57	-0.202	-26.122	1.8567
16.97	4.0784	-43.52	-0.048	-24.133	1.8896
17.931	3.4521	-42.46	0.0948	-22.205	1.9336
19.074	2.8424	-41.515	0.2102	-20.162	1.9775
20.282	2.2437	-40.593	0.3091	-17.964	1.9885
21.403	1.6119	-39.571	0.4629	-15.564	1.9885
22.419	0.99121	-38.401	0.6112	-13.048	1.9885
23.386	0.37598	-37.121	0.743	-10.439	1.9556
24.38	-0.23376	-35.792	0.8639	-7.8734	1.9446
25.336	-0.82703	-34.391	0.9683	-5.4674	1.9391
26.265	-1.3818	-32.941	1.0232	-3.2097	1.9391
27.176	-1.8927	-31.49	1.0232	-1.2047	1.9446
28.044	-2.3761	-30.029	1.0012	0.6959	1.9556
28.863	-2.7991	-28.546	0.8474	2.5581	1.9611
29.588	-3.2166	-26.991	0.6826	4.475	1.983
30.17	-3.634	-25.316	0.4794	6.513	1.983
30.692	-4.0515	-23.586	0.2432	8.601	1.9666
31.175	-4.4855	-21.839	0.0509	10.798	1.9501
31.67	-4.8865	-20.163	-0.207	13.023	1.9226
32.181	-5.282	-18.565	-0.515	15.198	1.8896
32.637	-5.683	-16.999	-0.801	17.313	1.8347
33.016	-6.0785	-15.478	-1.119	19.296	1.7688
33.285	-6.4905	-13.912	-1.427	21.202	1.6974
33.477	-6.908	-12.347	-1.745	22.954	1.615
33.669	-7.3474	-10.853	-2.036	24.58	1.5161
33.889	-7.7704	-9.496	-2.344	25.997	1.3953
34.158	-8.1879	-8.315	-2.646	27.25	1.2524
34.433	-8.5999	-7.364	-2.959	28.173	0.9613
34.691	-9.0118	-6.573	-3.289	28.859	0.46143
34.905	-9.4238	-6.013	-3.657	29.205	-0.17029
35.048	-9.8523	-5.541	-4.042	29.392	-0.91187
35.054	-10.286	-5.326	-4.421	29.194	-1.7963
35.12	-10.693	-5.293	-4.833	28.925	-2.8674
35.18	-11.061	-5.579	-5.36	28.101	-4.0265
35.13	-11.401	-6.167	-5.948	27.091	-5.235
35.125	-11.703	-7.029	-6.618	23.498	-7.2675
34.828	-12.011	-7.606	-7.293	18.845	-8.811
34.636	-12.335	-8.018	-7.98	14.055	-10.503
34.784	-12.659	-8.886	-8.727	9.891	-12.376
34.856	-13.016	-9.952	-9.419	6.771	-14.337
34.642	-13.368	-10.869	-10.035	4.223	-16.512
34.307	-13.648	-11.852	-10.655	2.3054	-18.896
33.867	-13.879	-12.929	-11.342	0.6025	-21.649
33.307	-14.088	-14.033	-12.067	-0.3423	-24.604
32.615	-14.28	-14.956	-12.814	-0.7982	-27.817
31.813	-14.401	-15.483	-13.605	-1.0289	-31.168
31.939	-14.45	-16.835	-14.511	-1.2651	-34.536
29.659	-14.521	-15.725	-15.462	-1.6002	-37.842
28.72	-14.593	-15.945	-16.434	-2.3253	-41.061
27.676	-14.692	-16.225	-17.335	-2.9955	-44.165
26.501	-14.78	-16.214	-18.175	-3.2152	-47.252
25.342	-14.785	-15.994	-18.977	-3.391	-50.356
24.265	-14.648	-15.752	-19.917	-3.5942	-53.481
23.315	-13.868	-15.604	-21.532	-3.77	-56.343
22.491	-12.467	-15.549	-24.031	-3.9019	-58.541
21.711	-10.358	-15.516	-27.53	-3.9788	-60.057
20.925	-8.1	-15.406	-31.304	-4.0447	-60.743
20.211	-5.8972	-15.357	-34.99	-4.1051	-60.194
19.557	-4.0405	-15.346	-38.11	-4.1655	-59.31
18.959	-3.0792	-15.335	-40.044	-4.1875	-58.502
18.409	-2.2168	-15.264	-41.796	-4.2424	-57.343
17.876	-1.5411	-15.165	-42.939	-4.3633	-55.591
17.217	-0.83801	-15.005	-43.79	-4.4841	-53.855
16.476	0.062866	-14.753	-44.74	-4.5006	-51.943
15.679	0.85938	-14.363	-45.24	-4.4622	-49.85
14.894	1.524	-13.951	-45.141	-4.4347	-47.845
14.048	2.2491	-13.478	-44.927	-4.4677	-45.873
13.152	2.9523	-12.912	-44.554	-4.4731	-43.83
12.224	3.6115	-12.27	-44.883	-4.4731	-41.622
11.279	4.3091	-11.627	-44.339	-4.4841	-39.045
10.318	5.1495	-10.979	-43.867	-4.5006	-36.167
9.373	6.1548	-10.375	-43.482	-4.4182	-33.162
8.4667	7.2424	-9.836	-43.12	-4.2095	-30.114
7.6152	8.385	-9.43	-42.708	-3.8909	-27.07
6.8572	9.5935	-9.04	-40.769	-3.6931	-24.148
6.176	10.851	-8.688	-40.192	-3.6107	-21.357
5.5773	12.104	-8.458	-39.538	-3.6052	-18.715
4.995	13.362	-8.403	-38.835	-3.7261	-16.216
4.3193	14.62	-8.331	-38.061	-3.8085	-13.722
3.6272	15.883	-8.183	-37.242	-3.7645	-11.118
2.9515	17.119	-7.996	-36.341	-3.7316	-8.4375
2.2759	18.306	-7.826	-35.287	-3.7371	-5.6689
1.5673	19.344	-7.661	-34.001	-3.781	-2.9224
0.8147	20.305	-7.441	-32.6	-3.814	-0.27466
0.051147	21.261	-7.156	-31.172	-3.814	2.3071
-0.66846	22.288	-6.859	-29.81	-3.803	4.7955
-1.3167	23.381	-6.694	-28.536	-3.814	7.1686
-1.8934	24.469	-6.639	-27.283	-3.8195	9.3439
-2.4043	25.502	-6.661	-26.009	-3.825	11.404
-2.9042	26.447	-6.749	-24.69	-3.8579	13.387
-3.3986	27.287	-6.854	-23.333	-3.9128	15.392
-3.8984	28.034	-6.936	-21.927	-4.0282	17.435
-4.3818	28.924	-7.029	-20.812	-4.193	19.391
-4.8323	29.847	-7.463	-19.972	-4.4182	21.066
-5.2882	30.319	-7.568	-18.626	-4.7203	22.599
-5.7551	30.863	-7.612	-17.395	-5.006	24.23
-6.1836	31.758	-7.754	-16.571	-5.3191	25.906
-6.5242	32.412	-8.035	-15.5	-5.7201	27.658
-6.8922	32.731	-8.293	-14.116	-6.2145	29.46
-7.3372	33.302	-8.403	-13.039	-6.7528	31.168
-7.7491	33.571	-8.501	-11.748	-7.7031	32.668
-8.0897	33.725	-8.65	-10.518	-8.6589	33.893
-8.4138	33.67	-8.87	-9.211	-9.7686	34.909
-8.6665	33.478	-9.265	-7.876	-10.917	35.662
-8.9521	33.318	-9.677	-6.711	-12.125	36.255
-9.3147	33.198	-10.029	-5.821	-13.356	36.733
-9.5784	33.055	-10.501	-5.036	-14.586	37.167
-9.8805	32.901	-10.885	-4.41	-15.85	36.914
-10.177	32.95	-11.308	-4.25	-17.217	35.953
-10.43	33.016	-11.819	-4.453	-18.783	33.613
-10.672	33.286	-12.396	-5.272	-20.464	30.212
-10.913	33.791	-13.028	-6.59	-22.249	25.598
-11.166	34.456	-13.66	-8.211	-24.221	20.934
-11.358	35.192	-14.352	-9.93	-26.435	16.798
-11.484	36.301	-15.104	-12.254	-28.874	13.661
-11.523	37.026	-15.917	-14.303	-31.554	10.898
-11.506	36.895	-16.796	-15.495	-34.609	8.399
-11.435	36.609	-17.746	-16.61	-37.959	6.2238
-11.309	36.098	-18.801	-17.643	-41.387	4.5758
-11.155	35.532	-19.988	-18.67	-44.809	3.7408
-11.056	34.835	-21.081	-19.554	-48.083	3.197
-11.012	34.027	-22.075	-20.186	-51.171	2.8125
-11.001	33.132	-22.976	-20.68	-54.236	2.5433
-10.979	32.242	-23.789	-21.076	-57.323	2.3236
-10.985	31.324	-24.465	-21.405	-60.421	2.1204
-10.963	30.374	-25.184	-21.499	-63.541	1.9501
-10.562	29.319	-26.338	-21.46	-66.48	1.7688
-9.4301	28.144	-28.42	-21.136	-69.018	1.604
-7.848	26.968	-31.122	-20.719	-70.688	1.4447
-5.9803	25.826	-34.286	-20.246	-70.732	1.3074
-3.8105	24.722	-37.709	-19.752	-69.292	1.181
-2.0363	23.651	-40.323	-19.159	-66.848	1.0712
-0.58057	22.612	-42.812	-18.56	-63.937	0.95581
0.53455	21.596	-44.762	-17.802	-60.904	0.85693
1.6002	20.629	-46.536	-17.203	-57.927	0.75256
2.5945	19.695	-47.948	-16.544	-55.219	0.65918
3.38	18.712	-48.838	-15.802	-53.016	0.5658
4.0776	17.311	-49.217	-14.61	-50.956	0.48889
4.8302	16.542	-49.398	-14.006	-49.188	0.45593
5.5718	15.784	-49.283	-13.468	-47.792	0.41748
6.3079	14.949	-49.025	-12.831	-46.781	0.38452
7.0659	14.065	-48.678	-12.051	-45.694	0.36255
7.8954	13.164	-48.376	-11.254	-44.37	0.33508
8.7413	12.285	-48.025	-10.534	-42.706	0.28564
9.6257	11.357	-47.668	-9.749	-40.591	0.24719
10.532	10.439	-47.272	-8.98	-38.284	0.20325
11.427	9.5331	-46.805	-8.255	-35.691	0.1593
12.29	8.6157	-46.135	-7.568	-33.082	0.10986
13.213	7.7148	-45.421	-6.914	-30.593	0.076904
14.174	6.8469	-44.614	-6.343	-28.242	0.043945
15.163	6.0944	-43.768	-5.887	-25.973	0.060425
16.174	5.3967	-42.872	-5.558	-23.721	0.071411
17.074	4.743	-41.763	-5.305	-21.496	0.071411
17.893	4.0948	-40.483	-5.063	-19.31	0.10986
18.695	3.3917	-39.131	-4.783	-17.113	0.10437
19.53	2.6501	-37.753	-4.432	-14.899	0.093384
20.409	1.9031	-36.346	-4.08	-12.68	0.076904
21.321	1.1945	-34.924	-3.767	-10.516	0.071411
22.249	0.62866	-33.506	-3.641	-8.3953	0.10437
23.183	0.13977	-32.089	-3.624	-6.2694	0.14832
24.078	-0.31616	-30.644	-3.679	-4.0227	0.18127
24.913	-0.74463	-29.161	-3.844	-1.6826	0.19226
25.688	-1.1511	-27.64	-3.987	0.7344	0.19775
26.413	-1.5686	-26.063	-4.234	3.074	0.17029
27.072	-2.0081	-24.399	-4.475	5.316	0.13184
27.665	-2.475	-22.668	-4.69	7.496	0.082397
28.253	-2.9254	-20.982	-4.92	9.611	0.043945
28.841	-3.3759	-19.356	-5.151	11.638	0
29.319	-3.8318	-17.659	-5.376	13.544	-0.082397
29.769	-4.2767	-16.016	-5.596	15.308	-0.19775
30.209	-4.7052	-14.418	-5.827	16.752	-0.32959
30.599	-5.1282	-12.852	-6.068	17.988	-0.48889
31.148	-5.5457	-11.578	-6.327	19.005	-0.7196
31.434	-5.9521	-10.127	-6.607	19.933	-1.0602
31.664	-6.3641	-8.754	-6.892	20.735	-1.4667
31.884	-6.7706	-7.474	-7.211	21.444	-1.9281
32.087	-7.1661	-6.337	-7.541	22.004	-2.4554
32.274	-7.5562	-5.321	-7.865	22.454	-3.0597
32.417	-7.9407	-4.53	-8.2	22.91	-3.8287
32.51	-8.3307	-3.931	-8.54	23.515	-4.6967
32.466	-8.7097	-3.525	-8.925	24.168	-5.6964
32.269	-9.0997	-3.107	-9.348	24.454	-6.7566
32.192	-9.4897	-3.261	-9.771	23.943	-8.042
32.164	-9.7974	-3.832	-10.331	22.268	-9.5032
32.258	-10.083	-4.953	-10.963	18.488	-11.272
32.483	-10.363	-6.183	-11.661	14.605	-13.184
32.9	-10.643	-7.425	-12.38	10.919	-15.315
33.323	-10.885	-8.809	-13.133	7.634	-17.611
33.455	-11.132	-10.16	-13.88	5.047	-20.176
33.235	-11.368	-11.122	-14.605	2.7723	-22.917
32.873	-11.577	-12.226	-15.385	1.0475	-25.983
32.345	-11.764	-13.401	-16.275	-0.1995	-29.191
31.642	-11.94	-14.544	-17.203	-0.8861	-32.558
30.752	-12.039	-15.313	-18.236	-1.0839	-35.898
29.83	-12.055	-15.824	-19.362	-1.2761	-39.216
28.879	-12.072	-15.5	-20.45	-1.4189	-42.506
27.962	-12.104	-15.802	-21.471	-1.6716	-45.709
27.001	-12.088	-17.521	-22.444	-2.5505	-48.84
25.979	-11.956	-17.862	-23.619	-3.0834	-51.872
24.875	-11.099	-17.862	-25.586	-3.3361	-54.536
23.771	-9.6326	-17.659	-28.42	-3.5118	-56.42
22.667	-7.6825	-17.417	-31.936	-3.6711	-57.991
21.711	-5.4688	-17.241	-35.622	-3.7755	-59.156
20.865	-3.3044	-17.159	-38.956	-3.8799	-59.936
20.057	-1.3159	-16.999	-42.082	-3.9623	-59.93
19.354	0.1947	-16.862	-44.707	-3.9678	-59.398
18.717	1.3757	-16.752	-46.938	-4.0282	-57.497
18.113	2.381	-16.648	-48.542	-4.0831	-54.948
17.519	3.5455	-16.521	-50.102	-4.1106	-52.086
16.86	4.8254	-16.335	-51.601	-4.0227	-49.345
16.196	5.8032	-16.164	-52.321	-3.781	-46.78
15.427	6.6547	-15.912	-52.546	-3.5063	-44.379
14.57	7.4786	-15.467	-52.607	-3.2592	-42.193
13.614	8.2642	-14.852	-52.343	-3.2262	-40.166
12.636	9.0112	-14.159	-51.898	-3.2646	-38.106
11.697	9.8297	-13.528	-51.458	-3.3196	-35.947
10.746	10.665	-12.956	-50.953	-3.391	-33.602
9.7795	11.5	-12.352	-50.272	-3.4294	-30.883
8.7853	12.346	-11.682	-49.558	-3.424	-27.911
7.8569	13.279	-11.039	-48.816	-3.4075	-24.862
6.967	14.241	-10.463	-48.047	-3.402	-21.846
6.0771	15.213	-9.924	-47.196	-3.4404	-19.028
5.2147	16.213	-9.435	-46.333	-3.424	-16.436
4.4292	17.207	-8.941	-45.378	-3.3635	-13.958
3.7261	18.19	-8.617	-44.356	-3.3306	-11.552
3.0449	19.141	-8.37	-43.213	-3.3855	-9.1846
2.3143	20.058	-8.095	-41.944	-3.391	-6.8445
1.6112	20.893	-7.793	-40.511	-3.3635	-4.5374
0.8916	21.684	-7.502	-38.989	-3.3635	-2.2632
0.18298	22.508	-7.244	-37.451	-3.402	0
-0.51465	23.486	-6.996	-36.067	-3.391	2.3016
-1.0804	24.524	-6.892	-34.754	-3.3525	4.6143
-1.5913	25.557	-6.843	-33.446	-3.3251	6.9324
-2.0857	26.545	-6.826	-32.123	-3.3251	9.2505
-2.5856	27.446	-6.815	-30.733	-3.3196	11.486
-3.0635	28.232	-6.804	-29.266	-3.2756	13.64
-3.5359	28.924	-6.821	-27.745	-3.2372	15.688
-4.0028	29.55	-6.832	-26.217	-3.2152	17.6
-4.4587	30.056	-6.843	-24.613	-3.2152	19.435
-4.8707	30.473	-6.875	-22.987	-3.3031	21.231
-5.2498	30.814	-6.963	-21.274	-3.4789	22.989
-5.6068	31.182	-7.101	-19.774	-3.759	24.549
-5.9474	31.731	-7.26	-18.609	-4.1051	25.823
-6.2715	31.83	-7.452	-17.132	-4.561	26.691
-6.5791	32.104	-7.71	-15.863	-5.0829	27.422
-6.9142	32.489	-7.958	-14.803	-5.6047	28.07
-7.2712	32.731	-8.221	-13.666	-6.1321	28.685
-7.6063	33	-8.529	-12.666	-6.7034	29.41
-7.9469	33.082	-8.754	-11.584	-7.5054	30.218
-8.2655	33.132	-9.04	-10.633	-8.7249	31.102
-8.5237	33.071	-9.479	-9.727	-9.8235	31.959
-8.9302	32.972	-9.77	-8.914	-10.889	32.712
-9.3367	32.885	-10.029	-8.178	-12.032	33.234
-9.6608	32.879	-10.413	-7.799	-13.257	32.728
-9.9135	33.335	-10.864	-7.997	-14.515	31.58
-10.183	33.923	-11.27	-8.738	-15.822	29.152
-10.441	34.445	-11.748	-9.628	-17.228	25.752
-10.682	34.933	-12.314	-10.639	-18.849	21.506
-10.913	35.472	-12.907	-11.809	-20.596	17.424
-11.105	36.12	-13.539	-13.506	-22.562	14.134
-11.237	36.878	-14.231	-15.418	-24.699	11.519
-11.325	37.356	-14.945	-17.176	-27.132	9.4153
-11.331	37.35	-15.736	-18.39	-29.802	7.4048
-11.254	37.021	-16.604	-19.411	-32.84	5.8392
-11.083	36.406	-17.576	-20.224	-36.119	4.7021
-10.869	35.659	-18.664	-20.856	-39.668	4.1089
-10.617	34.895	-19.828	-21.449	-43.244	3.6969
-10.43	34.159	-20.96	-22.004	-46.721	3.4058
-10.298	33.253	-22.037	-22.257	-50.127	3.1641
-10.172	32.302	-23.064	-22.378	-53.494	2.9553
-10.034	31.346	-24.042	-22.488	-56.878	2.7576
-9.8585	30.396	-25.047	-22.526	-60.284	2.5598
-9.3092	29.243	-26.404	-22.273	-63.667	2.3676
-8.2435	28.012	-28.42	-21.719	-66.722	2.1863
-6.6725	26.815	-31.111	-21.18	-69.397	2.005
-4.651	25.672	-34.325	-20.642	-71.056	1.8512
-2.4263	24.562	-37.786	-20.131	-71.55	1.7084
-0.19604	22.903	-41.142	-18.95	-69.941	1.593
1.7101	21.871	-44.103	-18.362	-67.584	1.4996
2.9625	20.876	-46.283	-17.736	-64.936	1.4172
4.226	19.937	-48.266	-17.11	-62.168	1.3403
5.429	18.987	-50.09	-16.467	-59.542	1.2634
6.4012	18.02	-51.496	-15.764	-57.449	1.192
7.0439	17.114	-52.298	-15.083	-55.406	1.1371
7.6592	16.257	-52.469	-14.424	-53.412	1.0931
8.3129	15.504	-52.397	-13.869	-51.714	1.0602
9.016	14.675	-52.123	-13.259	-50.374	1.0272
9.774	13.796	-51.76	-12.638	-48.968	0.99426
10.604	12.889	-51.326	-11.968	-47.342	0.9613
11.477	11.967	-50.887	-11.276	-45.37	0.92285
12.389	11.049	-50.414	-10.606	-42.788	0.8844
13.328	10.132	-49.931	-9.892	-39.789	0.86243
14.262	9.209	-49.398	-9.167	-36.608	0.83496
15.207	8.2312	-48.838	-8.453	-33.213	0.8075
16.119	7.2809	-48.019	-7.705	-29.934	0.79651
16.899	6.3855	-46.866	-7.03	-25.671	0.79102
18.041	5.5615	-45.932	-6.426	-23.122	0.81299
18.887	4.776	-44.641	-5.92	-20.59	0.82397
18.382	3.9685	-41.894	-5.409	-18.058	0.81848
20.733	3.1665	-42.153	-4.871	-15.591	0.81848
21.76	2.3865	-39.384	-4.327	-13.18	0.8075
22.754	1.6284	-38.011	-3.915	-10.906	0.8075
23.617	1.0626	-36.467	-3.591	-8.6864	0.85693
24.463	0.59021	-34.918	-3.476	-6.3738	0.87891
25.309	0.13428	-33.353	-3.476	-3.9733	0.88989
26.1	-0.34363	-31.732	-3.476	-1.5837	0.90088
26.918	-0.78308	-30.139	-3.531	0.7673	0.91187
27.737	-1.1951	-28.563	-3.662	3.036	0.91187
28.506	-1.5906	-26.953	-3.849	5.228	0.89539
29.126	-2.0026	-25.217	-4.124	7.343	0.85693
29.643	-2.4255	-23.388	-4.366	9.43	0.8075
30.115	-2.832	-21.537	-4.64	11.572	0.75806
30.533	-3.233	-19.631	-4.948	13.742	0.67017
30.824	-3.6615	-17.609	-5.277	15.885	0.58228
31.088	-4.0955	-15.654	-5.613	17.961	0.50537
31.291	-4.5624	-13.72	-5.926	19.9	0.41748
31.521	-5.0403	-11.995	-6.211	21.696	0.29663
31.543	-5.5017	-10.199	-6.497	23.135	0.038452
31.51	-5.9412	-8.501	-6.81	24.262	-0.30762
31.807	-6.3861	-7.244	-7.112	25.08	-0.75256
32.142	-6.8201	-6.227	-7.42	25.756	-1.2854
32.637	-7.2595	-5.563	-7.722	26.349	-1.8842
33.076	-7.699	-5.26	-8.019	26.684	-2.5653
33.318	-8.1165	-5.024	-8.315	26.459	-3.3508
33.4	-8.512	-4.953	-8.65	25.673	-4.2627
33.279	-8.902	-4.892	-9.04	23.778	-5.3503
33.125	-9.281	-5.096	-9.452	21.114	-6.6028
33.142	-9.5941	-5.771	-9.985	17.675	-8.009
33.323	-9.8962	-7.018	-10.556	13.715	-9.624
33.554	-10.198	-8.397	-11.199	10.265	-11.47
33.966	-10.5	-10.062	-11.858	7.293	-13.447
33.895	-10.803	-11.303	-12.49	4.86	-15.584
33.642	-11.077	-12.457	-13.133	3.036	-18.04
33.23	-11.292	-13.555	-13.852	1.7067	-20.704
32.741	-11.484	-14.731	-14.616	0.8223	-23.505
32.038	-11.649	-15.687	-15.396	0.3224	-26.483
31.23	-11.764	-16.285	-16.236	0.0917	-29.691
30.417	-11.857	-16.796	-17.115	-0.1006	-33.052
29.522	-11.934	-17.148	-18.044	-0.4467	-36.425
28.599	-12.011	-17.455	-19.065	-1.2102	-39.76
27.616	-12.104	-17.889	-20.054	-1.8804	-42.968
26.473	-12.176	-17.988	-21.026	-2.0671	-46.137
25.254	-12.22	-17.752	-21.9	-2.2209	-49.312
24.144	-12.176	-17.538	-22.74	-2.4242	-52.498
23.078	-11.967	-17.395	-23.729	-2.6604	-55.745
22.09	-11.379	-17.318	-25.174	-2.8087	-58.771
21.167	-9.8523	-17.225	-27.876	-2.8856	-61.002
20.321	-7.666	-17.17	-31.584	-2.9515	-62.606
19.469	-5.4193	-17.115	-35.375	-3.0724	-63.073
18.64	-3.277	-17.054	-38.995	-3.1273	-62.776
17.915	-1.1786	-17.049	-42.307	-3.1713	-62.023
17.228	0.23865	-16.988	-44.993	-3.2097	-61.068
16.553	1.6998	-16.851	-47.591	-3.2152	-59.183
15.899	3.2819	-16.648	-50.008	-3.2646	-57.019
15.278	4.8145	-16.483	-52.118	-3.3251	-55.228
14.625	6.0669	-16.39	-53.617	-3.347	-53.586
13.894	7.16	-16.186	-54.579	-3.1987	-51.987
13.114	8.1268	-15.824	-55.057	-2.8801	-50.482
12.284	8.9508	-15.346	-55.15	-2.578	-48.95
11.378	9.7638	-14.736	-55.1	-2.4132	-47.247
10.433	10.566	-14.137	-54.936	-2.4736	-45.192
9.4445	11.351	-13.484	-54.667	-2.4956	-42.814
8.4337	12.137	-12.803	-54.222	-2.4901	-39.93
7.5493	12.972	-12.242	-53.612	-2.4846	-36.804
6.8187	13.906	-11.88	-53.008	-2.5231	-33.497
6.1486	14.845	-11.66	-52.293	-2.567	-30.251
5.4564	15.801	-11.429	-51.415	-2.567	-27.153
4.8192	16.773	-11.248	-50.448	-2.545	-24.186
4.193	17.734	-11.072	-49.41	-2.589	-21.445
3.5173	18.657	-10.896	-48.261	-2.6384	-18.825
2.8197	19.498	-10.699	-46.916	-2.6769	-16.26
2.1001	20.316	-10.452	-45.449	-2.7098	-13.645
1.364	21.184	-10.171	-43.971	-2.7648	-10.915
0.62244	22.107	-9.919	-42.483	-2.8417	-8.1738
-0.075195	23.112	-9.71	-41.016	-2.9076	-5.5151
-0.74536	24.15	-9.534	-39.577	-2.99	-2.9553
-1.432	25.167	-9.353	-38.127	-3.0944	-0.48889
-2.0857	26.177	-9.232	-36.693	-3.1823	1.8787
-2.6405	27.133	-9.172	-35.232	-3.2537	4.2682
-3.1624	28.04	-9.128	-33.721	-3.3855	6.7072
-3.6403	28.836	-9.155	-32.106	-3.6107	9.1956
-4.1127	29.556	-9.199	-30.42	-3.8579	11.761
-4.5631	30.132	-9.276	-28.568	-4.149	14.321
-5.0081	30.627	-9.375	-26.629	-4.4512	16.804
-5.4585	31.055	-9.452	-24.624	-4.7588	19.188
-5.9034	31.434	-9.523	-22.592	-5.0719	21.396
-6.3319	31.725	-9.6	-20.505	-5.3466	23.439
-6.7604	31.984	-9.666	-18.478	-5.6102	25.406
-7.1559	32.176	-9.754	-16.473	-5.9453	27.301
-7.5294	32.313	-9.864	-14.511	-6.4177	29.114
-7.8865	32.363	-9.979	-12.545	-7.2307	30.789
-8.2216	32.39	-10.111	-10.76	-8.1865	32.316
-8.4962	32.407	-10.358	-9.112	-9.2632	33.662
-8.7544	32.429	-10.71	-7.64	-10.329	34.711
-9.0181	32.418	-11.061	-6.398	-11.4	35.607
-9.2488	32.33	-11.435	-5.393	-12.504	36.365
-9.4465	32.264	-11.858	-4.558	-13.773	36.881
-9.6223	32.231	-12.336	-3.915	-15.168	36.365
-9.7926	32.258	-12.901	-3.706	-16.728	34.475
-9.9684	32.209	-13.522	-3.794	-18.393	31.509
-10.161	32.462	-13.187	-4.453	-20.266	27.576
-10.325	32.983	-15.302	-5.618	-22.309	23.192
-10.479	33.654	-16.049	-7.233	-24.534	19.243
-10.595	34.675	-16.873	-9.403	-26.946	15.886
-10.65	35.153	-17.741	-11.1	-29.709	12.898
-10.661	35.027	-18.631	-12.248	-32.708	10.058
-10.622	34.796	-19.543	-13.286	-36.015	7.5311
-10.567	34.423	-20.46	-14.424	-39.498	5.7788
-10.435	33.846	-21.487	-15.423	-43.129	4.7681
-10.216	33.137	-22.641	-16.253	-46.771	4.3121
-9.9849	32.368	-23.838	-17.588	-50.259	3.988
-9.8091	31.495	-24.926	-17.923	-53.604	3.7244
-9.6772	30.55	-25.893	-18.219	-56.889	3.4937
-9.5289	29.561	-26.783	-18.379	-60.229	3.3069
-9.4081	28.463	-27.453	-16.967	-63.673	3.0981
-9.2488	27.199	-28.161	-17.873	-67.244	2.9169
-8.8478	26.007	-29.145	-17.428	-70.831	2.7411
-7.6558	24.859	-31.111	-17.011	-73.753	2.5873
-5.9584	23.2	-33.885	-16	-75.209	2.428
-4.0138	22.107	-36.863	-15.528	-75.351	2.2906
-1.9594	21.052	-39.747	-15.11	-73.984	2.1533
-0.080688	19.992	-42.444	-14.583	-70.578	2.038
1.5563	19.042	-44.806	-14.078	-66.332	1.9226
2.8691	18.168	-46.706	-13.644	-61.976	1.8402
4.0227	17.333	-48.25	-13.413	-57.878	1.7468
5.4399	16.564	-49.903	-12.979	-54.51	1.7139
6.3353	15.801	-50.661	-12.605	-51.324	1.6534
7.2307	15.054	-51.139	-12.204	-48.215	1.604
8.1151	14.285	-51.222	-11.743	-45.463	1.5436
8.994	13.428	-51.095	-11.139	-43.491	1.5271
9.9114	12.554	-50.826	-10.496	-42.052	1.4996
10.829	11.664	-50.519	-9.881	-40.695	1.4612
11.708	10.758	-50.107	-9.244	-39.212	1.4227
12.543	9.8517	-49.574	-8.584	-37.284	1.3843
13.383	8.9398	-48.937	-7.942	-34.872	1.3458
14.284	8.0719	-48.299	-7.376	-32.214	1.3239
15.234	7.3029	-47.519	-6.898	-29.451	1.3239
16.218	6.5723	-46.651	-6.64	-26.841	1.3074
17.162	5.8527	-45.63	-6.393	-24.628	1.2909
18.091	5.1385	-44.542	-6.156	-22.507	1.2689
19.068	4.4409	-43.405	-5.937	-20.304	1.2689
20.079	3.7048	-42.268	-5.755	-17.937	1.2415
21.26	2.9138	-41.235	-5.486	-15.514	1.225
22.403	2.1063	-40.175	-5.173	-13.169	1.2195
23.469	1.2878	-38.978	-4.849	-10.95	1.2085
24.435	0.49683	-37.681	-4.536	-8.8073	1.2195
25.402	-0.21179	-36.374	-4.283	-6.6265	1.2469
26.374	-0.82703	-35.033	-4.124	-4.4127	1.3129
27.325	-1.3818	-33.649	-4.074	-2.199	1.3568
28.259	-1.9092	-32.248	-4.052	-0.0072	1.3788
29.165	-2.3981	-30.842	-4.063	2.1077	1.3953
29.945	-2.8705	-29.31	-4.14	4.195	1.3953
30.61	-3.3099	-27.678	-4.272	6.293	1.3843
31.175	-3.7329	-25.959	-4.443	8.342	1.3513
31.686	-4.1394	-24.201	-4.673	10.523	1.2854
32.131	-4.5569	-22.41	-4.953	12.781	1.1865
32.527	-4.9799	-20.586	-5.206	15.061	1.0712
32.906	-5.3754	-18.79	-5.514	17.241	0.88989
33.224	-5.7874	-17.038	-5.832	19.18	0.63171
33.488	-6.2103	-15.373	-6.178	20.993	0.21973
33.68	-6.6498	-13.791	-6.535	22.674	-0.29114
33.801	-7.1277	-12.231	-6.854	24.075	-0.88989
33.845	-7.6166	-10.66	-7.145	25.272	-1.5381
34.043	-8.0945	-9.501	-7.447	26.19	-2.2467
34.449	-8.5504	-8.754	-7.76	27.025	-2.9553
34.872	-8.9954	-8.243	-8.079	27.838	-3.6694
35.092	-9.4293	-7.826	-8.381	28.458	-4.4275
35.35	-9.8303	-7.738	-8.711	28.678	-5.3229
35.433	-10.226	-7.441	-9.062	28.436	-6.3391
35.345	-10.605	-7.419	-9.463	27.019	-7.5421
35.136	-10.962	-7.524	-9.919	24.685	-8.8824
35.18	-11.275	-8.21	-10.463	21.185	-10.443
35.416	-11.566	-9.336	-11.029	17.203	-12.09
35.718	-11.83	-10.831	-11.661	13.374	-13.914
35.922	-12.072	-12.286	-12.331	10.078	-15.903
35.954	-12.302	-13.665	-13.056	7.453	-18.029
35.619	-12.511	-14.637	-13.781	5.107	-20.319
35.202	-12.703	-15.615	-14.511	3.36	-22.95
34.636	-12.846	-16.505	-15.286	1.7891	-25.823
33.944	-12.961	-17.455	-16.099	0.6135	-28.889
33.164	-13.055	-18.351	-16.928	-0.0621	-32.151
32.28	-13.126	-18.911	-17.846	-0.2214	-35.48
31.296	-13.198	-19.23	-18.818	-0.3698	-38.771
30.275	-13.307	-19.515	-19.768	-0.5565	-41.968
29.258	-13.417	-19.735	-20.653	-0.6829	-45.016
28.182	-13.494	-19.686	-21.466	-0.7598	-48.043
26.99	-13.5	-19.405	-22.262	-1.0234	-51.103
25.869	-13.253	-19.109	-23.328	-1.6332	-54.207
24.803	-12.56	-18.977	-24.992	-2.3693	-57.074
23.776	-11.275	-18.79	-27.607	-2.4956	-59.211
22.908	-9.2151	-18.592	-31.145	-2.545	-60.782
22.106	-6.9958	-18.439	-34.908	-2.6989	-61.633
21.376	-4.7931	-18.395	-38.495	-2.8582	-61.117
20.7	-2.9858	-18.395	-41.329	-2.957	-60.145
20.063	-1.9476	-18.351	-43.367	-2.99	-59.079
19.486	-1.1292	-18.296	-45.07	-2.9735	-57.426
18.904	-0.41504	-18.147	-46.031	-2.979	-54.987
18.283	0.37048	-17.955	-46.998	-2.968	-52.789
17.607	1.2219	-17.719	-47.674	-2.9131	-50.389
16.871	1.969	-17.461	-47.718	-2.6989	-47.823
16.009	2.6666	-17.082	-47.492	-2.4352	-45.483
15.091	3.3588	-16.686	-47.064	-2.2704	-43.083
14.119	3.9465	-15.868	-46.443	-2.166	-40.627
13.147	4.5453	-13.714	-45.768	-2.2539	-38.018
12.191	5.2374	-14.445	-45.174	-2.3363	-35.052
11.219	5.9845	-13.693	-44.504	-2.3583	-31.937
10.257	6.7865	-12.901	-43.796	-2.3198	-28.768
9.4719	7.6544	-12.264	-43.021	-2.2594	-25.741
8.8292	8.6652	-11.847	-42.34	-2.2759	-23.066
8.214	9.7363	-11.578	-41.692	-2.3088	-20.638
7.5548	10.78	-11.221	-40.972	-2.2979	-18.314
6.9121	11.851	-10.902	-40.192	-2.2759	-15.963
6.2419	12.944	-10.583	-39.357	-2.3033	-13.535
5.5663	14.065	-10.292	-38.467	-2.3308	-11.096
4.8796	15.246	-9.979	-37.599	-2.3473	-8.7286
4.182	16.416	-9.661	-36.643	-2.3583	-6.4325
3.4514	17.526	-9.314	-35.583	-2.3802	-4.2133
2.7043	18.608	-8.968	-34.468	-2.3967	-2.016
1.9957	19.657	-8.639	-33.326	-2.3857	0.1593
1.342	20.712	-8.425	-32.199	-2.3967	2.3071
0.77075	21.794	-8.309	-31.123	-2.3857	4.3835
0.29285	22.865	-8.287	-30.057	-2.3748	6.3831
-0.1521	23.892	-8.364	-28.958	-2.3857	8.2892
-0.58057	24.711	-8.463	-27.673	-2.4022	10.129
-1.031	25.32	-8.54	-26.184	-2.4187	11.931
-1.465	25.936	-8.628	-24.701	-2.4407	13.837
-1.8879	26.644	-8.727	-23.339	-2.4736	15.93
-2.2944	27.391	-8.859	-22.032	-2.5231	18.078
-2.7064	28.067	-8.968	-20.664	-2.5945	20.22
-3.1019	28.71	-9.078	-19.285	-2.7428	22.324
-3.4645	29.308	-9.21	-17.912	-2.968	24.307
-3.7886	30.034	-9.397	-16.786	-3.2207	26.164
-4.1127	30.418	-9.6	-15.346	-3.4185	27.85
-4.4148	30.858	-9.847	-13.984	-3.803	29.553
-4.7279	31.297	-10.078	-12.638	-4.3907	31.278
-5.0465	31.544	-10.281	-11.139	-5.2697	32.964
-5.3486	31.769	-10.55	-9.705	-6.1815	34.53
-5.6398	31.874	-10.88	-8.233	-7.033	35.832
-5.9913	31.89	-11.16	-6.761	-7.8624	36.821
-6.3704	31.797	-11.435	-5.36	-8.5765	37.579
-6.7274	31.813	-11.677	-4.278	-9.2852	38.145
-7.1064	31.753	-11.874	-3.338	-10.126	38.145
-7.4635	31.72	-12.089	-2.591	-11.098	38.705
-7.7986	31.725	-12.341	-2.163	-12.268	38.721
-8.0952	31.665	-12.693	-1.646	-13.465	38.551
-8.3754	31.511	-13.066	-1.405	-14.69	38.029
-8.6061	31.489	-13.467	-1.553	-15.959	37.079
-8.8258	31.775	-13.912	-2.361	-17.311	34.997
-9.0565	32.456	-14.396	-3.723	-18.783	31.591
-9.3367	33.132	-14.879	-4.871	-20.381	27.186
-9.6058	33.917	-15.456	-6.228	-22.084	22.654
-9.8311	35.021	-16.093	-8.035	-23.93	18.644
-10.045	36.241	-16.697	-10.166	-26.039	15.238
-10.095	36.911	-17.428	-12.018	-28.539	12.343
-10.089	36.878	-18.153	-13.144	-31.346	9.7394
-9.9519	36.548	-19.032	-14.083	-34.449	7.4432
-9.7487	36.016	-20.037	-14.912	-37.839	5.3448
-9.496	35.477	-21.136	-15.885	-41.206	3.9825
-9.2598	34.846	-22.245	-16.758	-44.496	3.1091
-9.0785	34.071	-23.344	-17.423	-47.682	2.785
-8.9412	32.736	-24.388	-17.428	-50.742	2.5543
-8.8148	31.83	-25.387	-17.774	-53.824	2.3511
-8.7269	30.989	-26.272	-18.197	-56.949	2.1478
-8.6116	30.16	-27.024	-18.576	-60.13	1.983
-8.3864	29.232	-27.815	-18.681	-63.437	1.8347
-7.8645	28.133	-28.914	-18.554	-66.678	1.6699
-6.5626	27.012	-30.941	-18.302	-69.49	1.5326
-4.7499	25.864	-33.808	-17.912	-71.534	1.4008
-2.8108	24.727	-37	-17.445	-71.841	1.2854
-0.92114	23.645	-40.005	-17.005	-69.842	1.1755
0.86414	22.557	-42.702	-16.478	-66.963	1.0876
2.0287	21.53	-44.877	-15.951	-63.766	1.0162
3.0724	20.53	-46.597	-15.39	-60.459	0.93933
4.0667	19.575	-48.173	-14.803	-57.273	0.87891
5.1049	18.652	-49.645	-14.22	-54.439	0.81848
5.9069	17.729	-50.557	-13.638	-51.857	0.78552
6.6924	16.795	-50.997	-13.039	-49.49	0.73059
7.5164	15.867	-51.255	-12.314	-47.314	0.70862
8.2909	15.037	-51.249	-11.628	-45.524	0.70313
9.0929	14.219	-50.997	-11.018	-44.073	0.67566
9.9059	13.334	-50.694	-10.375	-42.733	0.66467
10.675	12.401	-50.293	-9.507	-41.091	0.65918
11.406	11.478	-49.799	-8.694	-39.173	0.6427
12.136	10.549	-49.2	-7.947	-37.004	0.60425
12.894	9.621	-48.569	-7.162	-34.554	0.57678
13.658	8.6816	-47.811	-6.376	-32.027	0.54932
14.46	7.7423	-46.987	-5.624	-29.56	0.51636
15.328	6.8359	-46.102	-4.926	-27.182	0.48889
16.25	5.9241	-45.229	-4.256	-24.864	0.46143
17.14	5.0012	-44.196	-3.619	-22.584	0.42847
17.876	4.1223	-42.938	-3.042	-20.381	0.401
18.596	3.3533	-41.565	-2.553	-18.234	0.42847
19.365	2.6227	-40.164	-2.19	-16.069	0.43396
20.162	1.9196	-38.719	-1.811	-13.96	0.45044
20.997	1.189	-37.308	-1.399	-11.774	0.44495
22.024	0.48584	-36.028	-1.015	-9.4829	0.43396
22.985	-0.11841	-34.753	-0.702	-7.1813	0.4834
23.908	-0.56885	-33.418	-0.592	-4.8741	0.53833
24.781	-0.95886	-32.045	-0.614	-2.6219	0.57678
25.655	-1.3763	-30.677	-0.641	-0.4247	0.57678
26.495	-1.7938	-29.299	-0.696	1.7451	0.58777
27.308	-2.1564	-27.898	-0.844	3.849	0.58777
28.061	-2.5024	-26.442	-1.064	5.881	0.57678
28.703	-2.8375	-24.888	-1.339	7.859	0.53833
29.187	-3.1891	-23.509	-1.608	9.782	0.49438
29.643	-3.5352	-20.389	-1.932	11.688	0.42847
30.104	-3.8977	-18.708	-2.284	13.544	0.34607
30.56	-4.3097	-17.065	-2.624	15.363	0.26917
30.983	-4.7437	-15.445	-2.97	17.082	0.19775
31.302	-5.2106	-13.83	-3.272	18.724	0.10437
31.571	-5.683	-12.264	-3.558	20.208	0
31.73	-6.1609	-10.677	-3.811	21.35	-0.12634
31.857	-6.6223	-9.161	-4.036	21.916	-0.25269
32.01	-7.0673	-7.859	-4.256	22.399	-0.41199
32.159	-7.4738	-6.683	-4.508	22.707	-0.62622
32.334	-7.8583	-5.865	-4.8	22.855	-0.93384
32.752	-8.2318	-5.475	-5.135	23.026	-1.3184
33.164	-8.5944	-5.403	-5.497	23.218	-1.7853
33.45	-8.9679	-5.392	-5.838	23.267	-2.3126
33.516	-9.3304	-5.376	-6.184	23.289	-2.9993
33.378	-9.6985	-5.266	-6.546	23.278	-3.8342
33.318	-10.067	-5.513	-6.942	23.399	-4.8779
33.29	-10.396	-5.931	-7.409	23.24	-6.059
33.323	-10.687	-6.788	-7.964	21.619	-7.3993
33.521	-10.973	-7.925	-8.535	18.494	-8.8
33.763	-11.27	-8.974	-9.117	15.401	-10.399
34.081	-11.528	-10.034	-9.787	12.199	-12.14
34.653	-11.813	-11.803	-10.469	9.26	-14.128
34.988	-12.137	-13.462	-11.1	7.008	-16.188
34.839	-12.467	-14.637	-11.622	5.041	-18.517
34.543	-12.676	-15.851	-12.259	3.475	-21.083
33.993	-12.835	-16.901	-12.951	2.0582	-23.873
33.219	-12.956	-17.746	-13.715	0.8607	-26.895
32.373	-13.033	-18.521	-14.594	0.0807	-29.921
31.445	-13.093	-19.125	-15.506	-0.194	-32.975
30.417	-13.154	-19.4	-16.44	-0.3533	-36.057
29.407	-13.203	-19.642	-17.445	-0.4796	-39.144
28.418	-13.231	-19.867	-18.434	-0.5455	-42.198
27.435	-13.242	-19.971	-19.389	-0.5345	-45.231
26.369	-13.143	-19.823	-20.455	-0.54	-48.257
25.199	-12.423	-19.482	-22.235	-0.5345	-51.075
24.1	-11.165	-19.158	-24.927	-0.6829	-53.251
23.029	-9.2041	-18.796	-28.464	-1.1168	-55.124
21.958	-7.1057	-18.516	-32.095	-1.6222	-56.821
20.892	-4.848	-18.224	-35.781	-2.0177	-58.31
19.997	-2.7771	-17.972	-39.198	-2.0507	-58.986
19.233	-1.3324	-17.757	-41.966	-2.0836	-59.019
18.602	-0.063477	-17.675	-44.394	-2.155	-58.332
17.948	1.1011	-17.499	-46.394	-2.2155	-56.541
17.333	2.381	-17.291	-48.333	-2.2155	-54.393
16.723	3.4412	-17.087	-49.844	-2.1935	-52.273
16.124	4.2212	-16.994	-50.662	-2.0891	-50.158
15.361	4.9792	-16.708	-50.838	-1.8914	-48.043
14.399	5.8142	-16.137	-50.865	-1.5453	-46.165
13.394	6.6382	-15.395	-50.651	-1.4354	-44.385
12.367	7.5006	-14.489	-50.305	-1.3475	-42.61
11.477	8.4564	-13.846	-49.997	-1.3695	-40.633
10.51	9.4287	-13.198	-49.635	-1.4629	-38.084
9.5049	10.379	-12.451	-49.173	-1.4849	-35.145
8.4832	11.368	-11.622	-48.668	-1.4904	-31.893
7.5164	12.395	-10.858	-48.042	-1.4958	-28.301
6.632	13.373	-10.221	-47.196	-1.5508	-24.686
5.7476	14.279	-9.672	-46.13	-1.5892	-21.231
4.9565	15.197	-9.122	-44.966	-1.5673	-18.023
4.2809	16.141	-8.771	-43.73	-1.5673	-15.255
3.6656	17.086	-8.562	-42.389	-1.6552	-12.7
3.001	17.993	-8.364	-40.939	-1.6991	-10.256
2.3033	18.91	-8.084	-39.45	-1.6936	-7.7728
1.6112	19.761	-7.831	-37.808	-1.6771	-5.1196
0.8916	20.596	-7.573	-36.083	-1.6881	-2.3676
0.18848	21.448	-7.353	-34.342	-1.6936	0.39551
-0.46521	22.393	-7.205	-32.699	-1.6826	3.1036
-0.98706	23.497	-7.183	-31.255	-1.6771	5.6799
-1.4814	24.672	-7.189	-29.942	-1.6936	8.1189
-1.9594	25.875	-7.222	-28.711	-1.7101	8.1189
-2.4318	27.056	-7.238	-27.514	-1.7101	12.371
-2.8822	28.111	-7.271	-26.25	-1.7046	14.233
-3.5469	29.072	-7.095	-25.003	-1.7156	16.073
-3.9863	30.028	-7.167	-23.778	-1.765	18.023
-4.4093	31.011	-7.26	-22.641	-1.8254	20.006
-4.8268	31.698	-7.342	-21.274	-2.0067	21.874
-5.2278	32.335	-7.441	-19.917	-2.2759	23.725
-5.6123	32.983	-7.551	-18.631	-2.6439	25.565
-5.9749	33.478	-7.688	-17.22	-3.1603	27.334
-6.3374	33.835	-7.875	-15.709	-3.6492	29.614
-6.7054	34.214	-8.062	-14.292	-4.149	30.948
-7.068	34.565	-8.221	-12.918	-4.8192	32.141
-7.3591	34.659	-8.375	-11.38	-6.0057	33.289
-7.5789	34.521	-8.754	-9.749	-7.0769	34.426
-7.837	34.296	-9.188	-8.315	-8.0437	35.519
-8.2655	34.06	-9.446	-7.035	-9.005	36.535
-8.5951	33.851	-9.792	-5.931	-9.9938	37.183
-8.8533	33.615	-10.237	-5.052	-11.021	37.617
-9.1389	33.439	-10.6	-4.547	-12.098	37.826
-9.3477	33.406	-11.039	-4.283	-13.251	37.321
-9.5729	33.665	-11.534	-4.514	-14.602	35.925
-9.7761	34.115	-12.121	-5.365	-16.102	33.058
-9.9958	34.631	-12.764	-6.585	-17.651	29.251
-10.221	35.181	-13.407	-7.914	-19.266	24.796
-10.463	35.851	-14.05	-9.469	-21.041	20.5
-10.677	36.691	-14.725	-11.386	-23.035	17.221
-10.869	37.68	-15.439	-13.457	-25.226	14.453
-11.023	38.35	-16.159	-15.275	-27.627	11.827
-11.116	38.24	-16.901	-16.286	-30.395	9.3549
-11.105	37.977	-17.703	-17.143	-33.592	7.0752
-11.012	37.252	-18.96	-17.626	-37.042	5.0262
-10.814	38.103	-20.015	-19.812	-40.64	3.8672
-10.556	36.071	-21.18	-19.186	-44.315	3.252
-10.303	35.384	-22.372	-19.922	-47.924	2.9059
-10.089	34.538	-23.569	-20.373	-51.44	2.6587
-9.9189	33.637	-24.673	-20.669	-54.895	2.45
-9.7487	32.731	-25.706	-20.966	-58.317	2.2357
-9.6003	31.747	-26.601	-21.059	-61.761	2.049
-9.441	30.632	-27.31	-20.96	-65.255	1.8512
-9.2213	29.435	-28.107	-20.686	-68.804	1.6754
-8.5566	28.276	-29.37	-20.323	-72.138	1.5106
-7.1064	27.188	-31.633	-19.961	-74.374	1.3513
-5.2278	26.117	-34.665	-19.626	-75.5	1.2085
-3.1404	25.062	-38.038	-19.225	-75.016	1.0822
-1.2397	24.041	-40.884	-18.829	-72.149	0.9668
0.41919	23.019	-43.46	-18.445	-68.392	0.86243
1.7211	22.063	-45.641	-17.934	-64.486	0.79102
2.8691	21.151	-47.668	-17.434	-60.69	0.68665
3.7206	20.261	-49.156	-16.989	-57.521	0.62073
4.4567	19.371	-50.266	-16.401	-54.697	0.57129
5.2257	18.575	-51.024	-15.868	-51.775	0.53284
5.9783	17.828	-51.458	-15.407	-48.94	0.49988
6.632	17.103	-51.354	-14.962	-46.683	0.47791
7.3735	16.345	-51.139	-14.424	-44.963	0.46143
8.1755	15.499	-50.837	-13.77	-43.771	0.43396
9.005	14.664	-50.53	-13.133	-42.651	0.401
9.8564	13.757	-50.195	-12.446	-41.316	0.36255
10.73	12.845	-49.843	-11.743	-39.701	0.3241
11.587	11.923	-49.404	-11.084	-37.69	0.29114
12.416	10.972	-48.893	-10.392	-35.455	0.25818
13.24	10.06	-48.212	-9.749	-32.928	0.21973
14.07	9.187	-47.393	-9.194	-30.286	0.20325
14.987	8.4619	-46.531	-8.766	-27.588	0.21973
15.943	7.7863	-45.575	-8.447	-24.963	0.24719
16.943	7.0886	-44.553	-8.161	-22.485	0.26367
17.893	6.358	-43.422	-7.87	-20.112	0.26917
18.722	5.5725	-42.114	-7.475	-17.931	0.28015
19.546	4.787	-40.697	-7.057	-15.806	0.29114
20.469	3.9905	-39.307	-6.623	-13.63	0.29114
21.442	3.194	-37.923	-6.167	-11.444	0.29114
22.447	2.3975	-36.544	-5.689	-9.2083	0.29114
23.441	1.6394	-35.127	-5.261	-6.9615	0.28564
24.369	1.0516	-33.633	-5.003	-4.6874	0.31311
25.27	0.56824	-32.128	-4.844	-2.4132	0.33508
26.1	0.12329	-30.557	-4.882	-0.1445	0.32959
26.863	-0.32715	-28.931	-4.959	2.1241	0.30212
27.517	-0.79407	-27.189	-5.041	4.459	0.26917
28.121	-1.239	-25.387	-5.168	6.832	0.21973
28.599	-1.673	-23.459	-5.646	9.243	0.1593
29.044	-2.1014	-21.471	-4.432	11.622	0.076904
29.456	-2.5409	-19.515	-5.706	13.83	-0.027466
29.791	-2.9584	-17.527	-5.915	15.797	-0.1593
30.115	-3.3649	-15.588	-6.475	17.318	-0.34058
30.439	-3.7494	-13.769	-6.728	18.527	-0.55481
30.747	-4.1394	-12.045	-7.002	19.34	-0.84045
31.005	-4.5404	-10.43	-7.293	19.966	-1.1975
31.263	-4.9469	-8.935	-7.623	20.46	-1.6534
31.516	-5.3754	-7.595	-7.953	20.795	-2.1588
31.769	-5.8093	-6.42	-8.26	21.043	-2.7136
32.082	-6.2378	-5.64	-8.557	21.647	-3.3234
32.28	-6.6608	-4.953	-8.859	22.696	-4.043
32.422	-7.0728	-4.524	-9.156	23.723	-4.845
32.51	-7.4847	-4.233	-9.496	24.415	-5.7623
32.395	-7.9132	-4.019	-9.815	24.657	-6.7291
32.384	-8.3362	-4.09	-10.139	24.382	-7.8717
32.433	-8.7042	-4.711	-10.54	23.328	-9.1791
32.499	-8.9679	-5.563	-11.111	20.18	-10.794
32.659	-9.1931	-6.7	-11.776	16.478	-12.667
32.994	-9.4073	-7.886	-12.517	13.182	-14.782
33.384	-9.6106	-8.985	-13.226	9.985	-17.04
33.884	-9.7644	-10.594	-14.045	7.068	-19.616
34.092	-9.9512	-12.132	-14.874	4.876	-22.407
33.966	-10.171	-13.506	-15.758	3.195	-25.532
33.658	-10.38	-15.115	-16.764	2.0308	-28.779
33.12	-10.572	-16.554	-17.813	1.421	-32.069
32.23	-10.72	-17.351	-18.884	1.2452	-35.392
31.296	-10.803	-17.988	-19.988	1.0365	-38.815
30.302	-10.77	-18.526	-21.142	0.8717	-42.281
29.286	-10.715	-18.873	-22.218	0.5916	-45.753
28.33	-10.451	-19.29	-23.482	-0.1775	-49.18
27.314	-9.7589	-19.713	-25.459	-0.584	-52.18
26.193	-8.1934	-19.905	-28.563	-0.6938	-54.69
25.067	-6.1169	-19.74	-32.238	-0.5895	-56.816
23.87	-3.9581	-19.504	-35.891	-0.6444	-58.574
22.677	-1.8542	-19.219	-39.494	-0.6664	-60.211
21.639	0.45837	-18.977	-43.323	-0.6389	-61.353
20.744	2.0789	-18.68	-46.388	-0.606	-61.782
20.035	3.5016	-18.57	-49.102	-0.6664	-61.024
19.382	4.6497	-18.505	-51.025	-0.7708	-59.073
18.728	5.7153	-18.378	-52.799	-0.8641	-56.722
18.08	6.781	-18.147	-54.15	-0.9246	-54.278
17.514	7.6544	-18.082	-54.771	-0.9136	-51.812
16.855	8.4894	-17.944	-55.007	-0.9465	-49.504
15.904	9.4177	-17.516	-55.046	-0.9136	-47.45
14.916	10.357	-16.911	-54.76	-0.7433	-45.604
13.927	11.313	-16.219	-54.392	-0.5291	-43.83
12.971	12.269	-15.56	-54.046	-0.3917	-41.726
11.971	13.148	-14.874	-53.595	-0.2928	-39.276
10.933	14.076	-14.154	-53.15	-0.1775	-36.442
10.768	14.949	-14.313	-52.453	-0.1061	-33.036
8.3513	15.817	-12.165	-51.557	-0.1281	-29.383
7.3735	16.762	-11.385	-50.684	-0.0951	-25.757
6.4781	17.685	-10.798	-49.596	-0.0841	-22.242
5.5718	18.564	-10.144	-48.388	-0.172	-17.682
4.6929	19.432	-9.534	-47.119	-0.2269	-15.123
3.8304	20.272	-8.93	-45.757	-0.2379	-12.744
3.0889	21.096	-8.408	-44.312	-0.183	-10.47
2.4187	21.832	-7.98	-42.741	-0.1281	-8.1958
1.7321	22.535	-7.661	-41.087	-0.1995	-5.8173
0.93555	23.239	-7.238	-39.346	-0.2599	-3.3453
0.15552	24.079	-6.826	-37.72	-0.2874	-0.78552
-0.49817	25.062	-6.54	-36.27	-0.2489	1.7908
-1.064	26.095	-6.376	-34.908	-0.2159	4.3671
-1.5309	27.133	-6.365	-33.584	-0.2269	6.8939
-2.0143	28.138	-6.376	-32.26	-0.2544	9.245
-2.4757	29.078	-6.425	-30.903	-0.2764	11.448
-2.9426	29.957	-6.458	-29.524	-0.2764	13.502
-3.3876	30.748	-6.529	-28.107	-0.2764	15.452
-3.838	31.407	-6.612	-26.613	-0.2764	17.474
-4.272	31.989	-6.738	-25.075	-0.2819	19.567
-4.7169	32.527	-6.881	-23.509	-0.3093	21.703
-5.1783	33.049	-7.04	-21.96	-0.3698	23.829
-5.6617	33.533	-7.167	-20.356	-0.4576	25.79
-6.1342	34.016	-7.271	-18.824	-0.5895	27.576
-6.5791	34.494	-7.359	-17.472	-0.8147	29.119
-6.9856	34.796	-7.491	-16.11	-1.2102	30.3
-7.3811	35.126	-7.645	-14.885	-1.7101	31.47
-7.7491	35.428	-7.842	-13.72	-2.2539	32.64
-8.0952	35.593	-8.117	-12.517	-2.7538	33.728
-8.4688	35.659	-8.348	-11.358	-3.5338	34.601
-8.8533	35.571	-8.573	-10.276	-4.5995	35.008
-9.1829	35.521	-8.93	-9.419	-5.7146	35.052
-9.5564	35.4	-9.265	-8.672	-6.7308	34.739
-9.9684	35.291	-9.54	-8.288	-7.78	33.766
-10.342	35.164	-9.908	-8.183	-8.9006	31.855
-10.666	35.258	-10.347	-8.551	-10.164	29.273
-10.985	35.664	-10.82	-9.557	-11.51	25.845
-11.314	36.219	-11.286	-11.144	-13.009	21.857
-11.644	36.779	-11.781	-12.82	-14.619	18.369
-11.94	37.438	-12.319	-14.682	-16.432	15.326
-12.193	38.334	-12.907	-16.863	-18.387	12.684
-12.396	38.971	-13.522	-18.758	-20.574	10.212
-12.512	38.856	-14.203	-19.763	-22.936	7.9211
-12.561	38.438	-14.923	-20.554	-25.627	5.8887
-12.506	39.427	-15.741	-22.894	-28.605	4.389
-12.402	37.4	-16.631	-22.295	-31.78	3.7738
-12.254	36.675	-17.593	-22.9	-35.048	3.4113
-12.072	35.9	-18.592	-23.41	-38.503	3.1366
-11.853	35.098	-19.664	-23.872	-41.969	2.8949
-11.638	34.175	-20.757	-24.119	-45.403	2.6862
-11.452	33.17	-21.806	-24.152	-48.808	2.5104
-11.254	32.099	-22.833	-24.037	-52.176	2.3456
-11.04	30.847	-23.822	-23.734	-55.571	2.1478
-10.825	29.572	-24.673	-23.246	-59.042	1.972
-10.529	28.303	-25.552	-22.614	-62.596	1.8182
-9.9244	27.078	-26.794	-21.988	-66.172	1.6754
-8.6335	25.919	-28.865	-21.378	-69.375	1.5491
-6.9197	24.76	-31.545	-20.691	-71.792	1.4502
-4.7883	23.623	-34.852	-20.005	-73.44	1.3403
-2.3439	22.519	-38.511	-19.313	-73.682	1.2469
-0.53113	21.409	-41.34	-18.543	-71.495	1.1591
0.83118	20.404	-43.801	-17.807	-68.216	1.0767
1.9628	19.432	-45.806	-17.088	-64.634	0.98328
2.8636	18.509	-47.486	-16.346	-60.976	0.92285
3.5338	17.679	-48.673	-15.654	-57.663	0.87891
4.1875	16.927	-49.469	-15.088	-54.543	0.83496
4.8027	16.213	-49.953	-14.55	-51.511	0.79651
5.3356	15.504	-49.898	-13.995	-48.638	0.77454
5.9563	14.708	-49.711	-13.347	-46.067	0.74707
6.6155	13.862	-49.316	-12.633	-44.095	0.7196
7.3186	12.972	-48.86	-11.875	-42.458	0.68115
8.1261	12.065	-48.448	-11.106	-40.206	0.6427
8.9775	11.154	-48.047	-10.337	-38.47	0.59875
9.829	10.242	-47.569	-9.617	-36.306	0.54932
10.697	9.3573	-47.042	-8.936	-33.955	0.51636
11.625	8.5059	-46.514	-8.332	-31.329	0.50537
12.581	7.7753	-45.948	-7.859	-28.632	0.51086
13.526	7.0612	-45.218	-7.491	-26.056	0.52185
14.471	6.3196	-44.333	-7.112	-23.606	0.52185
15.503	5.556	-43.427	-6.695	-21.271	0.51636
16.454	4.809	-42.367	-6.299	-18.997	0.50537
17.327	4.0839	-41.087	-5.959	-16.805	0.48889
18.179	3.3313	-39.703	-5.591	-14.592	0.47791
19.145	2.5787	-38.39	-5.217	-12.246	0.46692
20.31	1.8207	-37.253	-4.844	-9.7905	0.45593
21.485	1.0626	-36.121	-4.492	-7.3406	0.44495
22.557	0.354	-34.825	-4.19	-5.0115	0.42847
23.512	-0.25574	-33.391	-3.998	-2.7593	0.45593
24.485	-0.78308	-31.974	-3.921	-0.5126	0.4834
25.402	-1.283	-30.496	-3.943	1.7781	0.50537
26.248	-1.7719	-28.925	-3.987	4.074	0.52734
27.012	-2.2607	-27.277	-4.02	6.293	0.53833
27.737	-2.7222	-25.596	-4.091	8.485	0.54382
28.297	-3.1506	-23.729	-4.228	10.661	0.52734
28.775	-3.5791	-21.751	-4.366	12.781	0.4834
29.203	-3.9856	-19.746	-4.53	14.846	0.41199
29.593	-4.3811	-17.741	-4.701	16.857	0.29663
29.901	-4.7546	-15.725	-4.942	18.757	0.12085
30.187	-5.1117	-13.632	-5.234	20.504	-0.093384
30.516	-5.4578	-11.995	-5.541	22.07	-0.44495
30.549	-5.7874	-10.199	-5.893	23.58	-0.92285
30.698	-6.1554	-8.611	-6.255	25.316	-1.5216
31.022	-6.5454	-7.309	-6.645	27.113	-2.2797
31.516	-6.9519	-6.343	-7.046	28.848	-3.1311
32.027	-7.3639	-5.629	-7.464	30.255	-3.9935
32.4	-7.7759	-4.816	-7.87	31.276	-4.8669
32.774	-8.1659	-4.618	-8.282	31.485	-5.8557
32.988	-8.5339	-4.656	-8.727	30.227	-6.9708
32.867	-8.88	-4.717	-9.222	28.376	-8.2837
32.84	-9.2041	-5.348	-9.804	25.783	-9.7339
32.911	-9.5117	-6.354	-10.403	21.867	-11.349
33.082	-9.8083	-7.601	-10.99	17.944	-13.013
33.29	-10.078	-8.913	-11.589	14.302	-14.804
33.494	-10.314	-10.347	-12.276	11.062	-16.771
33.499	-10.544	-11.611	-13.006	8.458	-19.039
33.373	-10.764	-12.764	-13.759	6.447	-21.489
33.142	-10.951	-13.89	-14.55	4.733	-24.197
32.73	-11.099	-15.132	-15.363	3.344	-27.081
32.208	-11.22	-16.28	-16.28	2.7339	-30.223
31.549	-11.346	-17.142	-17.264	2.5032	-33.475
30.785	-11.467	-17.615	-18.335	2.3109	-36.661
29.972	-11.616	-18.049	-19.4	2.1516	-39.743
29.132	-11.742	-18.389	-20.378	1.6243	-42.687
28.27	-11.835	-18.768	-21.328	0.8772	-45.643
27.27	-11.808	-19.081	-22.411	0.4268	-48.615
26.138	-11.132	-18.9	-24.355	0.2235	-51.367
24.54	-9.8523	-18.147	-27.19	0.0422	-53.41
24.924	-7.9132	-19.394	-30.788	-0.194	-55.124
22.54	-5.7819	-17.829	-34.567	-0.3862	-56.481
21.628	-3.634	-17.637	-38.187	-0.5181	-57.469
20.793	-1.5356	-17.466	-41.521	-0.6554	-57.991
20.112	-0.17883	-17.411	-44.043	-0.7378	-58.651
19.475	1.134	-17.307	-46.449	-0.7872	-57.854
18.86	2.337	-17.137	-48.393	-0.8257	-56.052
18.239	3.7103	-16.939	-50.316	-0.8696	-54.097
17.651	4.8639	-16.802	-51.805	-0.7927	-52.086
17.042	5.7593	-16.675	-52.563	-0.6334	-49.922
16.371	6.5887	-16.45	-52.733	-0.4631	-47.851
15.586	7.4731	-16.027	-52.799	-0.3038	-45.978
14.668	8.2532	-15.445	-52.557	-0.172	-44.116
13.729	9.0057	-14.742	-52.156	-0.0621	-42.149
12.784	9.7748	-14.05	-51.766	-0.0237	-40.012
11.818	10.571	-13.297	-51.294	-0.1116	-37.397
10.851	11.318	-12.528	-50.662	-0.205	-34.464
9.9004	12.049	-11.748	-49.92	-0.2874	-31.19
8.9885	12.791	-11.056	-49.052	-0.3368	-27.828
8.2305	13.516	-10.484	-48.02	-0.3093	-24.538
7.5493	14.318	-10.029	-46.96	-0.3203	-21.423
6.9066	15.164	-9.682	-45.872	-0.3643	-18.704
6.2474	16.021	-9.364	-44.691	-0.3917	-16.216
5.5773	16.91	-9.029	-43.493	-0.4027	-13.92
4.9456	17.861	-8.743	-42.34	-0.4247	-11.635
4.3083	18.822	-8.485	-41.17	-0.4851	-9.212
3.6492	19.811	-8.26	-39.967	-0.54	-6.6852
2.9296	20.854	-7.98	-38.758	-0.5675	-4.1144
2.2484	21.849	-7.749	-37.473	-0.551	-1.5765
1.6661	22.772	-7.634	-36.1	-0.551	0.86792
1.1498	23.661	-7.623	-34.633	-0.573	3.2629
0.6554	24.612	-7.656	-33.194	-0.6279	5.5426
0.20496	25.65	-7.732	-31.848	-0.6444	7.6465
-0.229	26.666	-7.826	-30.508	-0.6334	9.4592
-0.66846	27.633	-7.93	-29.162	-0.6169	11.135
-1.1134	28.484	-8.051	-27.772	-0.6115	12.788
-1.5638	29.237	-8.172	-26.344	-0.6169	14.507
-2.0198	29.918	-8.287	-24.905	-0.6389	16.342
-2.4537	30.5	-8.408	-23.432	-0.6664	18.226
-2.8657	30.984	-8.534	-22.037	-0.7378	20.099
-3.2502	31.775	-8.699	-21.098	-0.8367	21.764
-3.6183	32.154	-8.897	-19.774	-0.974	23.214
-3.9644	32.659	-9.117	-18.631	-1.1333	24.104
-4.3379	32.555	-9.265	-16.939	-1.3091	25.263
-4.673	32.621	-9.463	-15.429	-1.5233	26.598
-4.9641	33.247	-9.765	-14.599	-1.8749	28.087
-5.2772	33.698	-10.127	-13.841	-2.4022	29.35
-5.6343	34.109	-10.424	-13.193	-3.1273	30.339
-6.0078	34.373	-10.616	-12.484	-3.9568	31.146
-6.3099	34.302	-10.831	-11.512	-5.0939	31.805
-6.5901	34.164	-11.072	-10.617	-6.2969	32.239
-6.8593	33.945	-11.424	-9.738	-7.401	32.437
-7.1449	33.67	-11.786	-8.897	-8.4008	32.542
-7.3921	33.604	-12.143	-8.37	-9.5049	32.492
-7.5953	33.741	-12.561	-8.227	-10.724	31.805
-7.8041	34.137	-13.022	-8.799	-12.136	30.201
-8.0513	34.412	-13.511	-9.386	-13.592	27.933
-8.2655	34.648	-14.05	-10.089	-15.179	24.857
[truncated: 32,860 more rows]
